2 **Individual response to mTOR inhibition in delaying replicative senescence of**  
3 **mesenchymal stromal cells**

4 **Running Title:** Individual response to rapamycin-mediated lifespan extension

6  
7 Eliane Antonioli<sup>1</sup>, Natália Torres<sup>1</sup>, Mario Ferretti<sup>1</sup>, Carla A. Piccinato<sup>1</sup>, Andrea L.  
8 Sertie<sup>1\*</sup>

10  
11 1. Hospital Israelita Albert Einstein, São Paulo, SP, Brazil.

12  
13 \* Corresponding author:

14 E-mail: [andrea.sertie@einstein.br](mailto:andrea.sertie@einstein.br) (ALS)

16

18

## Abstract

20 Background aims: Delaying replicative senescence and extending lifespan of human  
mesenchymal stromal cells (MSCs) may enhance their potential for tissue engineering  
22 and cell based therapies. Accumulating evidence suggests that inhibitors of the mTOR  
signaling pathway, such as rapamycin, constitute promising pharmacological agents to  
24 retard senescence and extend stemness properties of various progenitor cell types. Here,  
we investigated whether the ability of rapamycin to postpone replicative senescence  
26 varies among bone marrow MSC samples (BM-MSCs) derived from different healthy  
donors, and explored the molecular mechanisms that drive rapamycin-mediated lifespan  
28 increment.

Methods: BM-MSCs at early passages were serially passaged either in absence or  
30 continuous presence of rapamycin and the number of cell population doublings until  
growth arrest was measured. The inhibition of mTOR signaling was assessed by the  
32 phosphorylation status of the downstream target RPS6. The expression levels of several  
senescence and pluripotency markers at early and late/senescent passages were analyzed  
34 by RT-qPCR, flow cytometry and western blot.

Results: We found that the lifespan extension in response to the continuous rapamycin  
36 treatment was highly variable among samples, but effective in most BM-MSCs. Despite  
all rapamycin-treated cells secreted significantly reduced levels of IL6, a major SASP  
38 cytokine, and expressed significantly higher levels of the pluripotency marker *NANOG*,  
the expression patterns of these markers were not correlated with the rapamycin-  
40 mediated increase in lifespan. Interestingly, rapamycin-mediated life-span extension  
was significantly associated only with repression of p16<sup>INK4A</sup> protein accumulation.

42 Conclusions: Taken together, our results suggest that some, but not all, BM-MSC  
samples would benefit from using rapamycin to postpone replicative arrest and  
44 reinforce a critical role of p16<sup>INK4A</sup> protein downregulation in this process.

46 **Key words:** Cellular senescence, mesenchymal stromal cells, mTOR signaling,  
rapamycin, senescence and pluripotency markers, p16<sup>INK4A</sup> protein expression.

48

## Introduction

50 In recent years, there has been increasing evidence that persistent activation of  
the growth-promoting mammalian target of rapamycin (mTOR) pathway plays a central  
52 role in cellular senescence and organismal aging [1-3], representing a key molecular  
driver of stem cell depletion and reduced tissue regenerative capacity [4-6]. Importantly,  
54 attenuation of mTOR signaling with rapamycin seems to preserve the clonogenic ability  
and function, besides delaying the activation of senescence mechanisms, in mouse and  
56 human stem cells from various tissues, including hematopoietic [5, 7, 8], epithelial [6,  
9], spermatogonial [10] and mesenchymal stem cells [11].

58 The mechanisms by which mTOR inhibition protects from stem cell exhaustion  
and aging have been associated with reduced accumulation of cytoplasmic and/or  
60 mitochondrial reactive oxygen species [6, 7, 11] and DNA damage [6, 9, 11], decreased  
secretion of major senescence-associated cytokines [6] and reduced expression of tumor  
62 suppressors such as p16<sup>INK4A</sup> [6, 11]. Moreover, the rapamycin-induced persistent  
expression of pluripotency genes, such as *NANOG* and *OCT4* [11], has been suggested  
64 to contribute to the retention of stemness properties of stem cells.

The possibility of retarding senescence and extending stemness properties of *in*  
66 *vitro* expanded mesenchymal stromal cells (MSCs) is particularly relevant to  
regenerative medicine, as replicative senescence might limit the number of cells  
68 required for clinical use [12, 13]. In a previous study, using long-term MSC cultures, we  
have shown that bone marrow MSCs (BM-MSCs) isolated from healthy young donors  
70 display variable *in vitro* replicative potential until reaching senescence and ceasing to  
proliferate [14]. Also, we documented that those BM-MSC samples with lower  
72 expression of the senescence marker p16<sup>INK4A</sup> and higher expression of the pluripotency  
marker *OCT4* at early passages present greater replicative lifespan [14]. Although

74 rapamycin has been shown to decelerate cell senescence in different experimental  
models, such as radiation and replicative induced senescence, no study has evaluated  
76 the effects of long-term treatment of BM-MSC samples endowed with variable  
replication capabilities with rapamycin. These observations prompted us to ask whether  
78 the ability of rapamycin to postpone replicative senescence varies among individual  
BM-MSC samples and to investigate the molecular players involved in lifespan  
80 extension mediated by mTOR inhibition in this long-term cell culture model.

## 82 **Materials and methods**

### 84 **Cell culture and long-term inhibition of mTOR (rapamycin treatment)**

Primary human BM-MSCs of five healthy young adults (3 males and 2 females,  
86 aging 30-39 years old) have been previously isolated and characterized [14]. The  
samples - referred to as BM09, BM12, BM13, BM16 and BM18 - were taken after  
88 written consent from donors, and the study was approved by the Ethics Committee of  
Hospital Israelita Albert Einstein.

90 Cells at an early passage (passage 5) were thawed and cultured under standard  
conditions as monolayers in DMEM-low glucose (Thermo Fisher Scientific, cat. 31600-  
92 034) supplemented with 15% fetal bovine serum (FBS, Thermo Fisher Scientific, cat.  
12483-020), 1 mM L-glutamine (Thermo Fisher Scientific, cat. 25030081) and 1%  
94 antibiotic-antimycotic solution (Thermo Fisher Scientific, cat. 15240-062) in T-25  
flasks at 37°C in a humidified atmosphere containing 5% CO<sub>2</sub>. In order to inhibit  
96 mTOR signaling, rapamycin (Sigma Aldrich, cat. R0395) was used at a final  
concentration of 20nM based both on previous studies [6, 9] and on pilot dose-response

98 studies of our group that have shown that either 20nM or 50nM of rapamycin were able  
to almost completely inhibit mTOR signaling, while maintaining the proliferative  
100 capacity of the cells (data not shown). Cells, cultured with either rapamycin or DMSO  
(Sigma, cat. D2650; used as vehicle control), were serially passaged at a density of 4000  
102 cells/cm<sup>2</sup> every 7 days until ceasing to proliferate (becoming senescent). Culture media  
(with and without rapamycin) were changed every two days. The number of cell  
104 population doublings in both conditions was assessed by the Trypan Blue exclusion  
method.

106 Cumulative cell population doublings (PD) in each conditions (with and without  
rapamycin) was calculated using the following equation:  $\log_{10}(N_H/N_I)/\log_{10}(2)$ , where  
108  $N_H$ = cell harvest number and  $N_I$ = plating cell number. The population doubling time  
(PDT) was calculated as follows:  $\log_{10}(2) \times T_{H-I} / [\log_{10}(N_H/N_I)]$ , where  $T_{H-I}$  is time  
110 between harvest and inoculum.

To examine whether the observed lifespan extension is rapamycin-dependent,  
112 rapamycin was withdrawn from BM09 cells during the exponential phase of growth and  
cells were cultured in rapamycin-free medium until proliferative arrest. After this,  
114 quiescent cells were cultured again in culture medium containing rapamycin (20nM).  
Results shown are representative of at least two independent experiments.

116

## **Immunoblotting**

118 Total protein extracts from rapamycin-treated and untreated (DMSO) cells were  
obtained at passages when untreated cells entered senescence and stop proliferating and  
120 at passages when rapamycin-treated cells entered into proliferative arrest using Ripa  
Buffer (Sigma, cat. R0278) containing protease and phosphatase inhibitor cocktails  
122 (Sigma Aldrich, cat. P8340 and P5726). Equal amounts (20 $\mu$ g) of proteins were

separated by SDS-PAGE and transferred to nitrocellulose membranes, which were then  
124 blocked and incubated with the following primary antibodies: anti-P16<sup>INK4A</sup> (Abcam,  
ab108349), anti-phospho-RPS6<sup>S240/244</sup> (Cell Signaling Technology, #5364), and  $\beta$ -actin  
126 (Sigma, A2228) for loading control. Detection was performed using horseradish  
peroxidase-coupled anti-rabbit or anti-mouse secondary antibodies (Cell Signaling  
128 Technology, #7074 and #7076), ECL substrate (GE Healthcare, cat. RPN2236), and the  
ChemiDoc<sup>TM</sup> MP Imaging System (Bio-Rad). The intensity of the bands was  
130 determined by densitometry using The Image Lab Software (Bio-Rad). The  
immunoblotting experiments were repeated more than three times and similar results  
132 were observed.

## 134 **Measurement of inflammatory cytokines**

The levels of proinflammatory cytokines IL6 and IL8 in culture supernatants  
136 from rapamycin-treated and untreated (DMSO) cells at passages when untreated cells  
have entered proliferative arrest were evaluated by flow cytometry using the Cytometric  
138 Bead Array (CBA) Human Inflammatory Cytokine Kit (BD Biosciences, cat. 551811)  
following the manufacturer's instructions. For data analysis, FCAP Array software (Soft  
140 Flow Inc.) was used. For each sample, secreted cytokine levels were normalized to cell  
number and expressed as pg/mL/cells. Results shown are representative of at least two  
142 independent experiments.

## 144 **Gene Expression Analyses (RT-qPCR)**

Total RNA was extracted from rapamycin-treated and untreated (DMSO) cells at  
146 passages when untreated cells entered proliferative senescence using the Illustra  
RNAspin Mini RNA Isolation Kit (GE Healthcare, cat. 25-0500-71). RNA quality and

148 quantity was assessed using the NanoDrop™ 3300 Fluorospectrometer (Thermo Fisher  
Scientific). The reverse transcription of 1 µg of total RNA was performed with  
150 QuantiTect Reverse Transcription kit (QIAGEN, cat. 205311). The qPCR were carried  
out using gene-specific primers (*OCT4*, *NANOG*, and *SOX2*) and the Maxima SYBR  
152 Green qPCR Master Mix (Thermo Fisher Scientific, cat. 0221) or the  
p16<sup>INK4A</sup>/CDKN2A predesigned TaqMan gene expression assay (Hs99999189\_m1,  
154 Thermo Fisher Scientific) in an ABI 7500 real-time PCR system (Applied Biosystems),  
according to the manufacturer's instruction. The expression levels of the target genes  
156 were normalized to the *GAPDH* housekeeping gene. Primer sequences used for qPCR  
were described previously [14]. All reactions were performed in triplicate. Results are  
158 expressed as the mean fold change of the normalized gene expression relative to a  
calibrator sample (#636690 reference RNA for RT-qPCR, Clontech) using the  
160 comparative CT method ( $\Delta\Delta C_t$  method). The RT-qPCR results are representative of two  
independent experiments.

162

## Statistical analysis

164 Statistical analyses were carried out using the SAS statistical analysis program  
(Statistical Analysis System Institute Inc., Cary, NC, USA). All correlation analyses  
166 were performed by the CORR procedure from at least duplicated results using the  
Spearman correlation method. The means obtained were calculated by the PROC GLM  
168 procedures of SAS and for that, log transformation was applied as needed. In all  
analysis, the level of significance was considered when  $p < 0.05$ .

170

## Results

### 172 **MSCs from different donors exhibit variable lifespan** **173 extension in response to continuous mTOR inhibition**

174 To evaluate the effects of mTOR inhibition on lifespan extension of BM-MSCs  
samples derived from 5 healthy young donors (referred to as BM09, BM12, BM13,  
176 BM16 and BM18), which were previously shown to display high heterogeneity in their  
proliferative capacity [14], we cultivated these cells and serially passaged them in the  
178 same growth medium supplemented or not with rapamycin during the entire replicative  
lifespan, and the number of cumulative cell population doublings (PDs) and PD time  
180 (PDT) until cell cycle arrest were measured in both conditions (rapamycin-treated and  
untreated conditions).

182 First, we observed that rapamycin delayed the development of senescence-  
associated phenotype as all cell samples expanded in the presence of rapamycin  
184 displayed a more elongated spindle-like shape during almost the entire replicative  
lifespan, whereas the corresponding untreated cells assumed the enlarged senescence-  
186 associated morphology at relatively early passages. Next, we observed that BM-MSCs  
from different donors presented variable lifespan extension in response to the  
188 continuous presence of rapamycin: while rapamycin delayed replicative senescence and  
extended dramatically the lifespan of 1 sample (BM09: 23 additional PDs compared  
190 with the corresponding untreated cells), it had a moderate impact on serial expansion of  
3 samples (BM18: 7 additional PDs, BM13: 5 additional PDs and BM16: 3 additional  
192 PDs compared with the corresponding untreated cells), and no impact on another  
sample (BM12) (Fig 1A). Also, we observed that the PDT of most samples treated with  
194 rapamycin remains significantly more constant for a longer period over the course of



serial passages compared to the corresponding untreated cells, and this effect is most  
196 evident for BM09, which showed the greater lifespan extension promoted by rapamycin  
(Fig 1B). This important effect on BM09 lifespan was mediated by the continuous  
198 presence of rapamycin, as these cells lose their proliferative potential few passages after  
rapamycin removal and returned to active proliferation after replacement of the drug in  
200 culture medium (Fig 1C), suggesting that the cells achieved the quiescent state and  
retained the capacity to resume proliferation upon mTOR inhibition.

202

**Fig 1. This is the Fig 1 Title. Lifespan extension and growth kinetics in response to  
204 continuous mTOR inhibition varies among different BM-MSC samples.**

This is the Fig 1 legend. (A) Cumulative population doubling (PD) curves of BM-MSC  
206 samples derived from 5 healthy young donors (BM09, BM12, BM13, BM16 and  
BM18) until replicative arrest in control conditions (DMSO) or in the continuous  
208 presence of rapamycin (RAPA). Each symbol represents a passage of rapamycin-treated  
(triangle) and untreated (dot) cells. The passage when untreated BM09, BM13, BM16  
210 and BM18 samples entered replicative senescence while the corresponding rapamycin-  
treated cells continue to proliferate is referred to as the “deviation passage” and is  
212 indicated by an arrow. Since rapamycin had no impact on lifespan extension of BM12,  
no “deviation passage” was assigned for this sample. (B) PD time (PDT) of BM-MSC  
214 samples at each passage in control conditions (dot) or in the continuous presence of  
rapamycin (triangle). (C) Cumulative PD curves of BM09 in which rapamycin was  
216 removed (RAPA removal) until cells ceased growth and then replaced in culture  
medium (RAPA replacement). Each dot represents a passage of cells. Data shown in  
218 panels A to C are representative of results from at least two independent experiments.

220 Finally, we observed that despite the fact that all rapamycin-treated samples  
progress towards growth arrest, cells continued to respond to rapamycin along the entire  
222 lifespan, as assessed by the phosphorylation status of ribosomal protein S6 (RPS6), a  
downstream target of the mTOR pathway (Fig 2), which may suggest that mTOR-  
224 independent mechanisms also may contribute to replicative senescence. As depicted in

Fig 2 and described hereafter, the passage when untreated cells entered replicative  
226 senescence is referred to as the “senescent passage without rapamycin”, the same  
passage of the corresponding rapamycin-treated samples (passage in which most  
228 samples still displayed proliferation ability) is referred to as the "deviation passage with  
rapamycin”, and the passage when rapamycin-treated cells entered into proliferative  
230 arrest is referred to as “senescent passage with rapamycin”.

232 **Fig 2. This is the Fig 2 Title. The ability of BM-MSCs to respond to rapamycin  
continues along the entire replicative lifespan.**

234 **This is the Fig 2 legend.** mTOR signaling inhibition is reflected by the phosphorylation  
status of RPS6, a downstream target of the mTOR pathway. Phosphorylated RPS6  
236 (pRPS6) was quantified by western blot in untreated and rapamycin-treated BM09 and  
BM18 samples at passages when untreated cells entered replicative arrest (S-R=  
238 senescent passage without rapamycin; D+R= deviation passage with rapamycin), as  
well as when rapamycin-treated cells stop proliferating (S+R= senescent passage with  
240 rapamycin). Since rapamycin had no impact on lifespan extension of BM12, pRPS6  
levels were measured in untreated and rapamycin-treated cells at the same senescent  
242 passage. Band intensities were densitometrically evaluated and bar graphs above bands  
represent the densitometric values of pRPS6 normalized to the loading control ( $\beta$ -actin).  
244 pRPS6 levels were greatly reduced by continuous rapamycin treatment. No consistent  
differences were seen in pRPS6 levels between rapamycin-treated BM09 and BM18  
246 cells at the deviation passage (D+R) and at the final senescent passage (S+R). Data  
show representative blots from at least two independent experiments.

248

**Expression levels of known senescence and pluripotency  
250 markers in early-passage MSCs have no association with  
lifespan extension promoted by continuous mTOR signaling  
252 attenuation**

We next evaluated whether the expression levels of senescence-associated  
254 proteins (cytoplasmic proteins p16<sup>INK4A</sup>, p21<sup>WAF1</sup>, pRPS6 and SOD2, as well as secreted  
SASP cytokines IL6 and IL8) and pluripotency-related genes (*NANOG*, *SOX2* and  
256 *OCT4*, whose protein expression in MSCs is rather low and poorly detected by Western  
blot) in all BM-MSC samples at early passages (5<sup>th</sup> or 6<sup>th</sup> passages) which we have  
258 previously quantified [14], could predict an individual lifespan extension in response to  
the continuous presence of rapamycin. Here we observed that the expression levels of  
260 these markers at early passages were not significantly correlated with the rapamycin-  
mediated increase in the replicative capacity of each sample expanded in normal  
262 medium (p16<sup>INK4A</sup>  $r = 0.20$   $p = 0.78$ ; p21<sup>WAF1</sup>  $r = -0.60$   $p = 0.35$ ; pRPS6  $r = -0.50$   $p = 0.45$ ;  
SOD2  $r = 0.30$   $p = 0.68$ ; IL6  $r = -0.20$   $p = 0.78$ ; IL8  $r = 0.30$   $p = 0.68$ ; *NANOG*  $r = 0.20$   $p = 0.78$ ;  
264 *SOX2*  $r = -0.40$   $p = 0.51$ ; *OCT4*  $r = -0.10$   $p = 0.95$ ) (Supplementary Figure 1a). Additionally,  
we did not observe any significant correlation between the inherent replicative capacity  
266 of untreated BM-MSC samples and the extent of lifespan extension promoted by  
rapamycin ( $r = 0.20$ ,  $p = 0.78$ ); in other words, the replicative potential (number of PD  
268 until cell cycle arrest) of untreated BM-MSC samples do not predict their response to  
rapamycin (S1 Fig).

270

### **mTOR attenuation significantly reduced the secretion of the 272 SASP protein IL6 and increased the expression of the pluripotency gene NANOG in MSCs**

274 To verify whether rapamycin treatment in our long-term BM-MSC culture  
model leads to the regulation of molecular events often associated with stem cell  
276 senescence, we analyzed the gene and protein expression of p16<sup>INK4A</sup>, the secretion of

cytokines IL6 and IL8, and the expression of pluripotency genes *OCT4* and *NANOG* in  
278 rapamycin-treated and untreated cells at passages when untreated cells entered into a  
state of proliferative arrest (referred to as the “deviation passage”, as depicted in Fig 1).

280 We observed that whereas rapamycin exerted no significant effect on p16<sup>INK4A</sup>  
mRNA expression, it decreased p16<sup>INK4A</sup> protein expression in BM09, BM13, BM16  
282 and BM18, but had no effect on the expression of this protein in BM12 (Fig 3A).  
Therefore, due to the lack of effect of mTOR inhibition on p16<sup>INK4A</sup> protein expression  
284 in BM12, there was not a significant effect of rapamycin treatment on p16<sup>INK4A</sup> levels  
when cells are analyzed in group (rapamycin-treated versus untreated cells; p=0.06).

286 Although all rapamycin-treated samples showed, as expected, decreased  
secretion of IL6 and IL8 compared to the corresponding untreated cells, only the effect  
288 of mTOR inhibition on IL6 secretion reached statistical significance (p<0.05) (Fig 3B).  
This lack of significance may be probably due to the highly variable IL8 secretion  
290 among samples. Finally, we observed that cells expanded in the presence of rapamycin  
showed significant increased expression levels of *NANOG* (p<0.05) (Fig 3C). The  
292 rapamycin-mediated significant decrease in the secretion of a major SASP cytokine and  
increase in the expression of *NANOG* may contribute to cell proliferation at a relatively  
294 more constant rate (less variable PDT, Fig 1B) over an extended period in culture and  
retention of the non-senescent phenotype of MSCs.

296

**Fig 3. This is the Fig 3 Title. mTOR signaling inhibition leads to the regulation of  
298 molecular events often associated with stem cell senescence.**

**This is the Fig 3 legend.** The expression of senescence- and pluripotency-related  
300 markers were analyzed in untreated and rapamycin-treated BM09, BM13, BM16 and  
BM18 samples at passages when untreated cells entered replicative senescence  
302 (deviation passage). Since rapamycin had no impact on lifespan extension of BM12, the

expression levels of these markers were measured in untreated and rapamycin-treated  
304 cells at the same senescent passage. (A) p16<sup>INK4A</sup> gene expression levels were analyzed  
by RT-qPCR. The bar graphs show relative gene expression levels after normalization  
306 to *GAPDH*. p16<sup>INK4A</sup> protein expression levels were analyzed by western blot. Band  
intensities were densitometrically evaluated and bar graphs above bands represent the  
308 densitometric values of p16<sup>INK4A</sup> normalized to the loading control ( $\beta$ -actin). These  
results are representative of at least two independent experiments. (B) The levels of IL6  
310 and IL8 secretion were determined using a CBA proinflammatory kit. The bar graphs  
represent the obtained concentration values for IL6 and IL8 (pg/mL) normalized against  
312 cell numbers. These results are representative of two independent experiments  
performed in triplicate. (C) The gene expression levels of *OCT4*, *SOX2* and *NANOG*  
314 were analyzed by RT-qPCR. The bar graphs show relative gene expression levels after  
normalization to *GAPDH*. These results are representative of two independent  
316 experiments performed in triplicate. S-R= senescent passage without rapamycin; D+R=  
deviation passage with rapamycin; S+R= senescent passage with rapamycin.  
318

## **Extension of MSCs lifespan by continuous attenuation of 320 mTOR signaling is correlated with downregulation of p16<sup>INK4A</sup> protein expression**

322 We then evaluated whether the rapamycin-mediated decrease in the expression  
of senescence-associated markers p16<sup>INK4A</sup>, IL6 and IL8 and increase in the expression  
324 of pluripotency gene *NANOG* at the “deviation passage” are correlated with the  
rapamycin-mediated lifespan extension. We observed that only p16<sup>INK4A</sup> expression was  
326 significantly and inversely correlated with lifespan promoted by mTOR signaling  
inhibition ( $r=-1.0$ ,  $p=0.016$ ), as the greater the fold reduction in p16<sup>INK4A</sup> expression  
328 levels, the greater the rapamycin extended lifespan (Fig 4). These results suggest that  
the ability of rapamycin in inhibiting p16<sup>INK4A</sup> accumulation, rather than inhibiting IL6

330 and IL8 secretion and stimulating *NANOG* expression, during serial passages is tightly  
associated with the MSC replicative lifespan extension.

332

**Fig 4. This is the Fig 4 Title. Downregulation of p16<sup>INK4A</sup> expression is correlated  
334 with lifespan extension promoted by the continuous presence of rapamycin.**

**This is the Fig 4 legend.** The fold reduction in p16<sup>INK4A</sup> protein expression and in IL6  
336 and IL8 secretion, and the fold increase in *NANOG* gene expression between untreated  
and rapamycin-treated BM09, BM13, BM16 and BM18 samples at passages when  
338 untreated cells entered replicative senescence (deviation passage), or in the case of  
BM12 at the same senescence passage, were plotted against the additional PD number  
340 obtained for the corresponding rapamycin-treated cells and statistically analyzed by  
Spearman correlation, as shown in the graphs.

342

Finally, since rapamycin-treated BM-MSCs reached proliferative arrest, we  
344 sought to verify whether the amount of p16<sup>INK4A</sup> protein is maintained at lower levels  
until the final passage or it is accumulated again in the arrested cells. We observed that  
346 the expression levels of p16<sup>INK4A</sup> in rapamycin-treated cells that ceased to proliferate (at  
the “senescent passage with rapamycin”) are slightly greater than those observed in the  
348 “deviation passage with rapamycin” (Fig 5), suggesting that the slight increase in  
p16<sup>INK4A</sup> accumulation may contribute to the cessation of rapamycin-treated cell  
350 proliferation, but that other molecular events might also be required to induce final  
growth arrest of rapamycin-treated cells.

352

**Fig 5. This is the Fig 5 Title. p16<sup>INK4A</sup> protein expression increased slightly in  
354 rapamycin-treated cells that stopped proliferating.**

**This is the Fig 5 legend.** The protein expression levels of p16<sup>INK4A</sup> were analyzed by  
356 western blot in rapamycin-treated BM-MSCs at the deviation passage with rapamycin

(D+R) and at the senescent passage with rapamycin (S+R). Band intensities were  
358 densitometrically evaluated and bar graphs above bands represent the densitometric  
values of p16<sup>INK4A</sup> normalized to the loading control ( $\beta$ -actin). The results obtained for  
360 BM12 is already showed in Fig 3a. Data show representative blots from at least two  
independent experiments.

362

## Discussion

364 It is well established that MSC cultures from a wide variety of healthy tissues  
have finite replicative lifespan and cease proliferating after a certain number of  
366 divisions [12]. The need for extensive MSC expansion for cellular therapy applications  
led to the search for new approaches to obtain sufficient number of cells before  
368 replicative senescence is reached. mTOR specific inhibitors, such as rapamycin, have  
emerged as potential adjuvant candidates for retarding the process of replicative  
370 senescence [15, 16]. Despite not yet being used for cellular therapy purposes, rapamycin  
has already been approved by the U.S. Food and Drug Administration (FDA) for a  
372 variety of clinical applications, including immunosuppressive and anticancer treatments  
[17].

374 Data from the present study show that rapamycin has variable ability of  
postponing replicative senescence of BM-MSC samples derived from different healthy  
376 donors. Interestingly, even cell samples that show greater inherent proliferation  
capabilities (BM09, BM12 and BM18) respond distinctly to rapamycin, despite that fact  
378 that no clinically relevant differences were observed among donors, and cells were  
expanded under the same standardized controlled conditions [14]. The effects of  
380 rapamycin in BM-MSC lifespan and aging was tested using a long-term *in vitro* BM-  
MSC expansion model, in which cells were continuously exposed to rapamycin  
382 treatment and exhibited attenuated mTOR signaling until proliferative arrest, as

monitored by the phosphorylation status of RPS6, a key downstream protein target of  
384 mTOR pathway. Others studies, using distinct *in vitro* models of cellular senescence,  
have shown that mTOR inhibition by rapamycin can delay the progression of stem cell  
386 senescence [6, 11]. However, results of our study provide evidence for the benefits of  
mTOR inhibition in long-term MSC expansion and also, for the first time, alert for  
388 marked interindividual variability in the response to rapamycin, suggesting that its use  
might benefit expansion of some cells, not all BM-MSCs.

390 The identification of reliable early predictors of stem cell lifespan extension in  
response to mTOR inhibition would be valuable for regenerative medicine and cellular  
392 therapy. However, none of the six classical senescence-associated proteins and the three  
pluripotent-related genes expressed by early-passage BM-MSCs evaluated here were  
394 useful predictors of rapamycin-mediated lifespan prolongation, as no correlation could  
be established.

396 To characterize important players involved in rapamycin-mediated  
postponement of replicative senescence of BM-MSCs in our model, we analyzed the  
398 expression levels of known senescence- and pluripotency-related markers in rapamycin-  
treated and untreated cells at the passage when untreated cells stop proliferating  
400 (become senescent) and the corresponding rapamycin-treated cells still displayed  
proliferation capacity. Our results showed that, as observed in other models of cellular  
402 senescence, rapamycin-treated cells secreted significantly reduced levels of a major  
SASP cytokine (IL6), which is known to act in an autocrine manner to reinforce the cell  
404 cycle arrest of senescent cells [6, 18], and expressed significantly increased levels of  
*NANOG*, a marker/inducer of pluripotency and cellular clonogenicity [11, 19, 20].  
406 Therefore, although we have not evaluated the clonogenic and differentiation capacity  
of rapamycin-treated BM-MSCs, the diminished secretion of IL6 and elevated



408 expression of *NANOG* may confer stemness properties to rapamycin-treated BM-MSCs,  
such as the observed cell PD at a relatively more constant rate. However, the expression  
410 patterns of these two markers were not correlated with the rapamycin-mediated increase  
in the replicative capacity of each sample, suggesting that other molecular triggers are  
412 involved in this process.

Finally, our data show a significant correlation between rapamycin-mediated  
414 lifespan extension of BM-MSCs and inhibition of p16<sup>INK4A</sup> protein expression, as more  
significant reductions in p16<sup>INK4A</sup> accumulation during successive cellular passages  
416 were found in rapamycin-treated cells which showed the longer lifespans. Although  
previous studies using cultured fibroblast have shown that chromatin-remodeling  
418 patterns of *p16<sup>INK4A</sup>* promoter region induced by caloric restriction (which is known to  
inhibits mTOR signaling) [21] or enhanced p16<sup>INK4A</sup> mRNA decay mediated by RNA  
420 binding proteins mainly expressed in non-senescent cells [22] may account to inhibit  
p16<sup>INK4A</sup> accumulation, our results suggest that the mechanisms underlying the  
422 rapamycin-mediated lifespan prolongation in long-term cultured BM-MSCs may  
involve either suppression of p16<sup>INK4A</sup> mRNA translation or enhanced degradation of  
424 p16<sup>INK4A</sup> protein, as p16<sup>INK4A</sup> transcript levels were not decreased in rapamycin-treated  
BM-MSCs. Indeed, suppression of mTOR is well known to attenuate the translation of  
426 specific mRNAs [18] and to augment autophagy [23, 24], two effector programs of  
cellular senescence [20, 25].

428 It is noteworthy that despite the presence of rapamycin at a dose that attenuates  
mTOR signaling along the entire experiment, all rapamycin-treated samples progressed  
430 towards growth arrest and, with exception of BM12 that did not show any response to  
rapamycin, showed only a slight increased level of p16<sup>INK4A</sup> expression at the final  
432 passage compared to the same cells at an intermediate passage (“deviation passage with

rapamycin”), suggesting that mTOR- and p16<sup>INK4A</sup>-independent mechanisms may  
434 contribute to replicative senescence of late passage rapamycin-treated cells. p16<sup>INK4A</sup>, a  
cyclin-dependent kinase inhibitor, negatively regulates cell cycle progression by  
436 inhibiting transition from the G1 to S phase [26], and an aging-associated increase in its  
expression have been shown to contribute to the decline in replicative potential of  
438 various progenitor cell types [27-29]. Nevertheless, the mechanisms by which p16<sup>INK4A</sup>  
are involved in cellular senescence, either as a cause of senescence or a consequence of  
440 it, remain to be explicitly elucidated [30].

Taken together, the results reported herein provide evidence supporting the  
442 potential use of rapamycin to delay senescence of BM-MSCs *in vitro* and the critical  
role of p16<sup>INK4A</sup> regulation in this process. However, caution should be taken when  
444 using rapamycin for this purpose as interindividual variability in response to rapamycin  
exists for unknown reasons, but that may involve modulators of p16<sup>INK4A</sup> protein levels.  
446 It is possible that other mTOR inhibitors or drugs that regulate p16<sup>INK4A</sup> turnover could  
exert similar effects on MSC expansion which opens new avenues of pharmacologic  
448 modulation of longevity. Thus, further investigation to unravel the molecular  
mechanisms of lifespan promoting effects of rapamycin would be of importance for  
450 increase long-term expansion of MSCs with maintenance of important cellular  
properties.

452

## Acknowledgments

454 The authors are grateful to all of the subjects who participated in this work. CAP is a  
visiting scientist supported by an institutional grant from Sociedade Beneficente  
456 Israelita Brasileira Albert Einstein.

458 **References**

- 460 1. Johnson SC, Rabinovitch PS, Kaeberlein M. mTOR is a key modulator of  
461 ageing and age-related disease. *Nature*. 2013;493(7432):338-45. doi:  
462 10.1038/nature11861. PubMed PMID: 23325216; PubMed Central PMCID:  
463 PMC3687363.
- 464 2. Xu S, Cai Y, Wei Y. mTOR Signaling from Cellular Senescence to Organismal  
465 Aging. *Aging and disease*. 2014;5(4):263-73. doi: 10.14336/AD.2014.0500263.  
466 PubMed PMID: 25110610; PubMed Central PMCID: PMC4113516.
- 467 3. Saxton RA, Sabatini DM. mTOR Signaling in Growth, Metabolism, and  
468 Disease. *Cell*. 2017;169(2):361-71. doi: 10.1016/j.cell.2017.03.035. PubMed PMID:  
469 28388417.
- 470 4. Harrison DE, Strong R, Sharp ZD, Nelson JF, Astle CM, Flurkey K, et al.  
471 Rapamycin fed late in life extends lifespan in genetically heterogeneous mice. *Nature*.  
472 2009;460(7253):392-5. Epub 2009/07/08. doi: 10.1038/nature08221. PubMed PMID:  
473 19587680; PubMed Central PMCID: PMC2786175.
- 474 5. Chen C, Liu Y, Zheng P. mTOR regulation and therapeutic rejuvenation of  
475 aging hematopoietic stem cells. *Sci Signal*. 2009;2(98):ra75. Epub 2009/11/24. doi:  
476 10.1126/scisignal.2000559. PubMed PMID: 19934433; PubMed Central PMCID:  
477 PMC4020596.
- 478 6. Iglesias-Bartolome R, Patel V, Cotrim A, Leelahavanichkul K, Molinolo AA,  
479 Mitchell JB, et al. mTOR inhibition prevents epithelial stem cell senescence and  
480 protects from radiation-induced mucositis. *Cell Stem Cell*. 2012;11(3):401-14. doi:  
481 10.1016/j.stem.2012.06.007. PubMed PMID: 22958932; PubMed Central PMCID:  
482 PMC3477550.
- 483 7. Jang YY, Sharkis SJ. A low level of reactive oxygen species selects for  
484 primitive hematopoietic stem cells that may reside in the low-oxygenic niche. *Blood*.  
485 2007;110(8):3056-63. Epub 2007/06/26. doi: 10.1182/blood-2007-05-087759. PubMed  
486 PMID: 17595331; PubMed Central PMCID: PMC2018677.
- 487 8. Gan B, DePinho RA. mTORC1 signaling governs hematopoietic stem cell  
488 quiescence. *Cell Cycle*. 2009;8(7):1003-6. Epub 2009/04/02. doi: 10.4161/cc.8.7.8045.  
489 PubMed PMID: 19270523; PubMed Central PMCID: PMC2743144.
- 490 9. Castilho RM, Squarize CH, Chodosh LA, Williams BO, Gutkind JS. mTOR  
491 mediates Wnt-induced epidermal stem cell exhaustion and aging. *Cell Stem Cell*.  
492 2009;5(3):279-89. doi: 10.1016/j.stem.2009.06.017. PubMed PMID: 19733540;  
493 PubMed Central PMCID: PMC2939833.
- 494 10. Hobbs RM, Seandel M, Falciatori I, Rafii S, Pandolfi PP. Plzf regulates  
495 germline progenitor self-renewal by opposing mTORC1. *Cell*. 2010;142(3):468-79. doi:  
496 10.1016/j.cell.2010.06.041. PubMed PMID: 20691905; PubMed Central PMCID:  
497 PMC3210556.
- 498 11. Gharibi B, Farzadi S, Ghuman M, Hughes FJ. Inhibition of Akt/mTOR  
499 attenuates age-related changes in mesenchymal stem cells. *Stem Cells*.  
500 2014;32(8):2256-66. doi: 10.1002/stem.1709. PubMed PMID: 24659476.
- 501 12. Wagner W, Horn P, Castoldi M, Diehlmann A, Bork S, Saffrich R, et al.  
502 Replicative senescence of mesenchymal stem cells: a continuous and organized process.  
503 *PLoS One*. 2008;3(5):e2213. doi: 10.1371/journal.pone.0002213. PubMed PMID:  
504 18493317; PubMed Central PMCID: PMC2374903.
- 505 13. Wagner W, Ho AD, Zenke M. Different facets of aging in human mesenchymal  
506 stem cells. *Tissue engineering Part B, Reviews*. 2010;16(4):445-53. doi:  
507 10.1089/ten.TEB.2009.0825. PubMed PMID: 20196648.

14. Piccinato CA, Sertie AL, Torres N, Ferretti M, Antonioli E. High OCT4 and  
508 Low p16(INK4A) Expressions Determine In Vitro Lifespan of Mesenchymal Stem  
Cells. *Stem Cells Int.* 2015;2015:369828. Epub 2015/05/21. doi: 10.1155/2015/369828.  
510 PubMed PMID: 26089914; PubMed Central PMCID: PMC4454755.
15. Blagosklonny MV. From rapalogs to anti-aging formula. *Oncotarget.*  
512 2017;8(22):35492-507. doi: 10.18632/oncotarget.18033. PubMed PMID: 28548953;  
PubMed Central PMCID: PMC5482593.
16. Leontieva OV, Blagosklonny MV. Gerosuppression by pan-mTOR inhibitors.  
514 *Aging (Albany NY).* 2016;8(12):3535-51. doi: 10.18632/aging.101155. PubMed PMID:  
516 28077803; PubMed Central PMCID: PMC5270685.
17. Wullschleger S, Loewith R, Hall MN. TOR signaling in growth and metabolism.  
518 *Cell.* 2006;124(3):471-84. doi: 10.1016/j.cell.2006.01.016. PubMed PMID: 16469695.
18. Laberge RM, Sun Y, Orjalo AV, Patil CK, Freund A, Zhou L, et al. mTOR  
520 regulates the pro-tumorigenic senescence-associated secretory phenotype by promoting  
IL1A translation. *Nat Cell Biol.* 2015;17(8):1049-61. Epub 2015/07/06. doi:  
522 10.1038/ncb3195. PubMed PMID: 26147250; PubMed Central PMCID:  
PMCPMC4691706.
19. Pospelova TV, Bykova TV, Zubova SG, Katolikova NV, Yartzeva NM,  
524 Pospelov VA. Rapamycin induces pluripotent genes associated with avoidance of  
526 replicative senescence. *Cell Cycle.* 2013;12(24):3841-51. Epub 2013/12/02. doi:  
10.4161/cc.27396. PubMed PMID: 24296616; PubMed Central PMCID:  
528 PMCPMC3905076.
20. Rubinsztein DC, Marino G, Kroemer G. Autophagy and aging. *Cell.*  
530 2011;146(5):682-95. doi: 10.1016/j.cell.2011.07.030. PubMed PMID: 21884931.
21. Li Y, Tollefsbol TO. p16(INK4a) suppression by glucose restriction contributes  
532 to human cellular lifespan extension through SIRT1-mediated epigenetic and genetic  
mechanisms. *PLoS One.* 2011;6(2):e17421. Epub 2011/02/24. doi:  
534 10.1371/journal.pone.0017421. PubMed PMID: 21390332; PubMed Central PMCID:  
PMCPMC3044759.
22. Wang W, Martindale JL, Yang X, Chrest FJ, Gorospe M. Increased stability of  
536 the p16 mRNA with replicative senescence. *EMBO Rep.* 2005;6(2):158-64. doi:  
538 10.1038/sj.embor.7400346. PubMed PMID: 15678155; PubMed Central PMCID:  
PMCPMC1299256.
23. Jung CH, Jun CB, Ro SH, Kim YM, Otto NM, Cao J, et al. ULK-Atg13-FIP200  
540 complexes mediate mTOR signaling to the autophagy machinery. *Mol Biol Cell.*  
542 2009;20(7):1992-2003. Epub 2009/02/18. doi: 10.1091/mbc.E08-12-1249. PubMed  
PMID: 19225151; PubMed Central PMCID: PMC2663920.
24. Lerner C, Bitto A, Pulliam D, Nacarelli T, Konigsberg M, Van Remmen H, et al.  
544 Reduced mammalian target of rapamycin activity facilitates mitochondrial retrograde  
546 signaling and increases life span in normal human fibroblasts. *Aging cell.*  
2013;12(6):966-77. doi: 10.1111/acer.12122. PubMed PMID: 23795962; PubMed  
548 Central PMCID: PMC5559196.
25. Hands SL, Proud CG, Wyttenbach A. mTOR's role in ageing: protein synthesis  
550 or autophagy? *Aging (Albany NY).* 2009;1(7):586-97. doi: 10.18632/aging.100070.  
PubMed PMID: 20157541; PubMed Central PMCID: PMC2806042.
26. Li J, Poi MJ, Tsai MD. Regulatory mechanisms of tumor suppressor  
552 P16(INK4A) and their relevance to cancer. *Biochemistry.* 2011;50(25):5566-82. doi:  
554 10.1021/bi200642e. PubMed PMID: 21619050; PubMed Central PMCID:  
PMC3127263.

- 556 27. Krishnamurthy J, Ramsey MR, Ligon KL, Torrice C, Koh A, Bonner-Weir S, et  
al. p16INK4a induces an age-dependent decline in islet regenerative potential. *Nature*.  
558 2006;443(7110):453-7. doi: 10.1038/nature05092. PubMed PMID: 16957737.
- 560 28. Molofsky AV, Slutsky SG, Joseph NM, He S, Pardal R, Krishnamurthy J, et al.  
Increasing p16INK4a expression decreases forebrain progenitors and neurogenesis  
562 during ageing. *Nature*. 2006;443(7110):448-52. doi: 10.1038/nature05091. PubMed  
PMID: 16957738; PubMed Central PMCID: PMC2586960.
- 564 29. Janzen V, Forkert R, Fleming HE, Saito Y, Waring MT, Dombkowski DM, et al.  
Stem-cell ageing modified by the cyclin-dependent kinase inhibitor p16INK4a. *Nature*.  
2006;443(7110):421-6. doi: 10.1038/nature05159. PubMed PMID: 16957735.
- 566 30. Coppe JP, Rodier F, Patil CK, Freund A, Desprez PY, Campisi J. Tumor  
suppressor and aging biomarker p16(INK4a) induces cellular senescence without the  
568 associated inflammatory secretory phenotype. *The Journal of biological chemistry*.  
2011;286(42):36396-403. doi: 10.1074/jbc.M111.257071. PubMed PMID: 21880712;  
570 PubMed Central PMCID: PMC3196093.

## 572 **Supporting information**

**S Fig 1. This is the S1 Fig Title: Expression levels of senescence- and pluripotency-  
574 related markers at an early passage as well as the replicative capacity of untreated  
BM-MSC samples were not correlated with the rapamycin-mediated replicative  
576 lifespan extension of BM-MSCs.**

This is the S1 Fig legend: The normalized expression values of senescence-associated  
578 proteins (p16<sup>INK4A</sup>, p21<sup>WAF1</sup>, pRPS6, SOD2, IL6 and IL8) and pluripotency-related  
genes (*NANOG*, *SOX2* and *OCT4*) in each BM-MSC sample at early passages (5<sup>th</sup> and  
580 6<sup>th</sup> passages) (previously determined in Piccinato et al., 2015) [14] **(A)**, as well the final  
PD number of each BM-MSC sample expanded in normal medium (without rapamycin)  
582 **(B)**, were plotted against the additional PD number obtained for the corresponding  
rapamycin-treated cells and statistically analyzed by Spearman correlation, as shown in  
584 the graphs. RAPA= rapamycin. PD= population doubling.

# pRPS6 expression

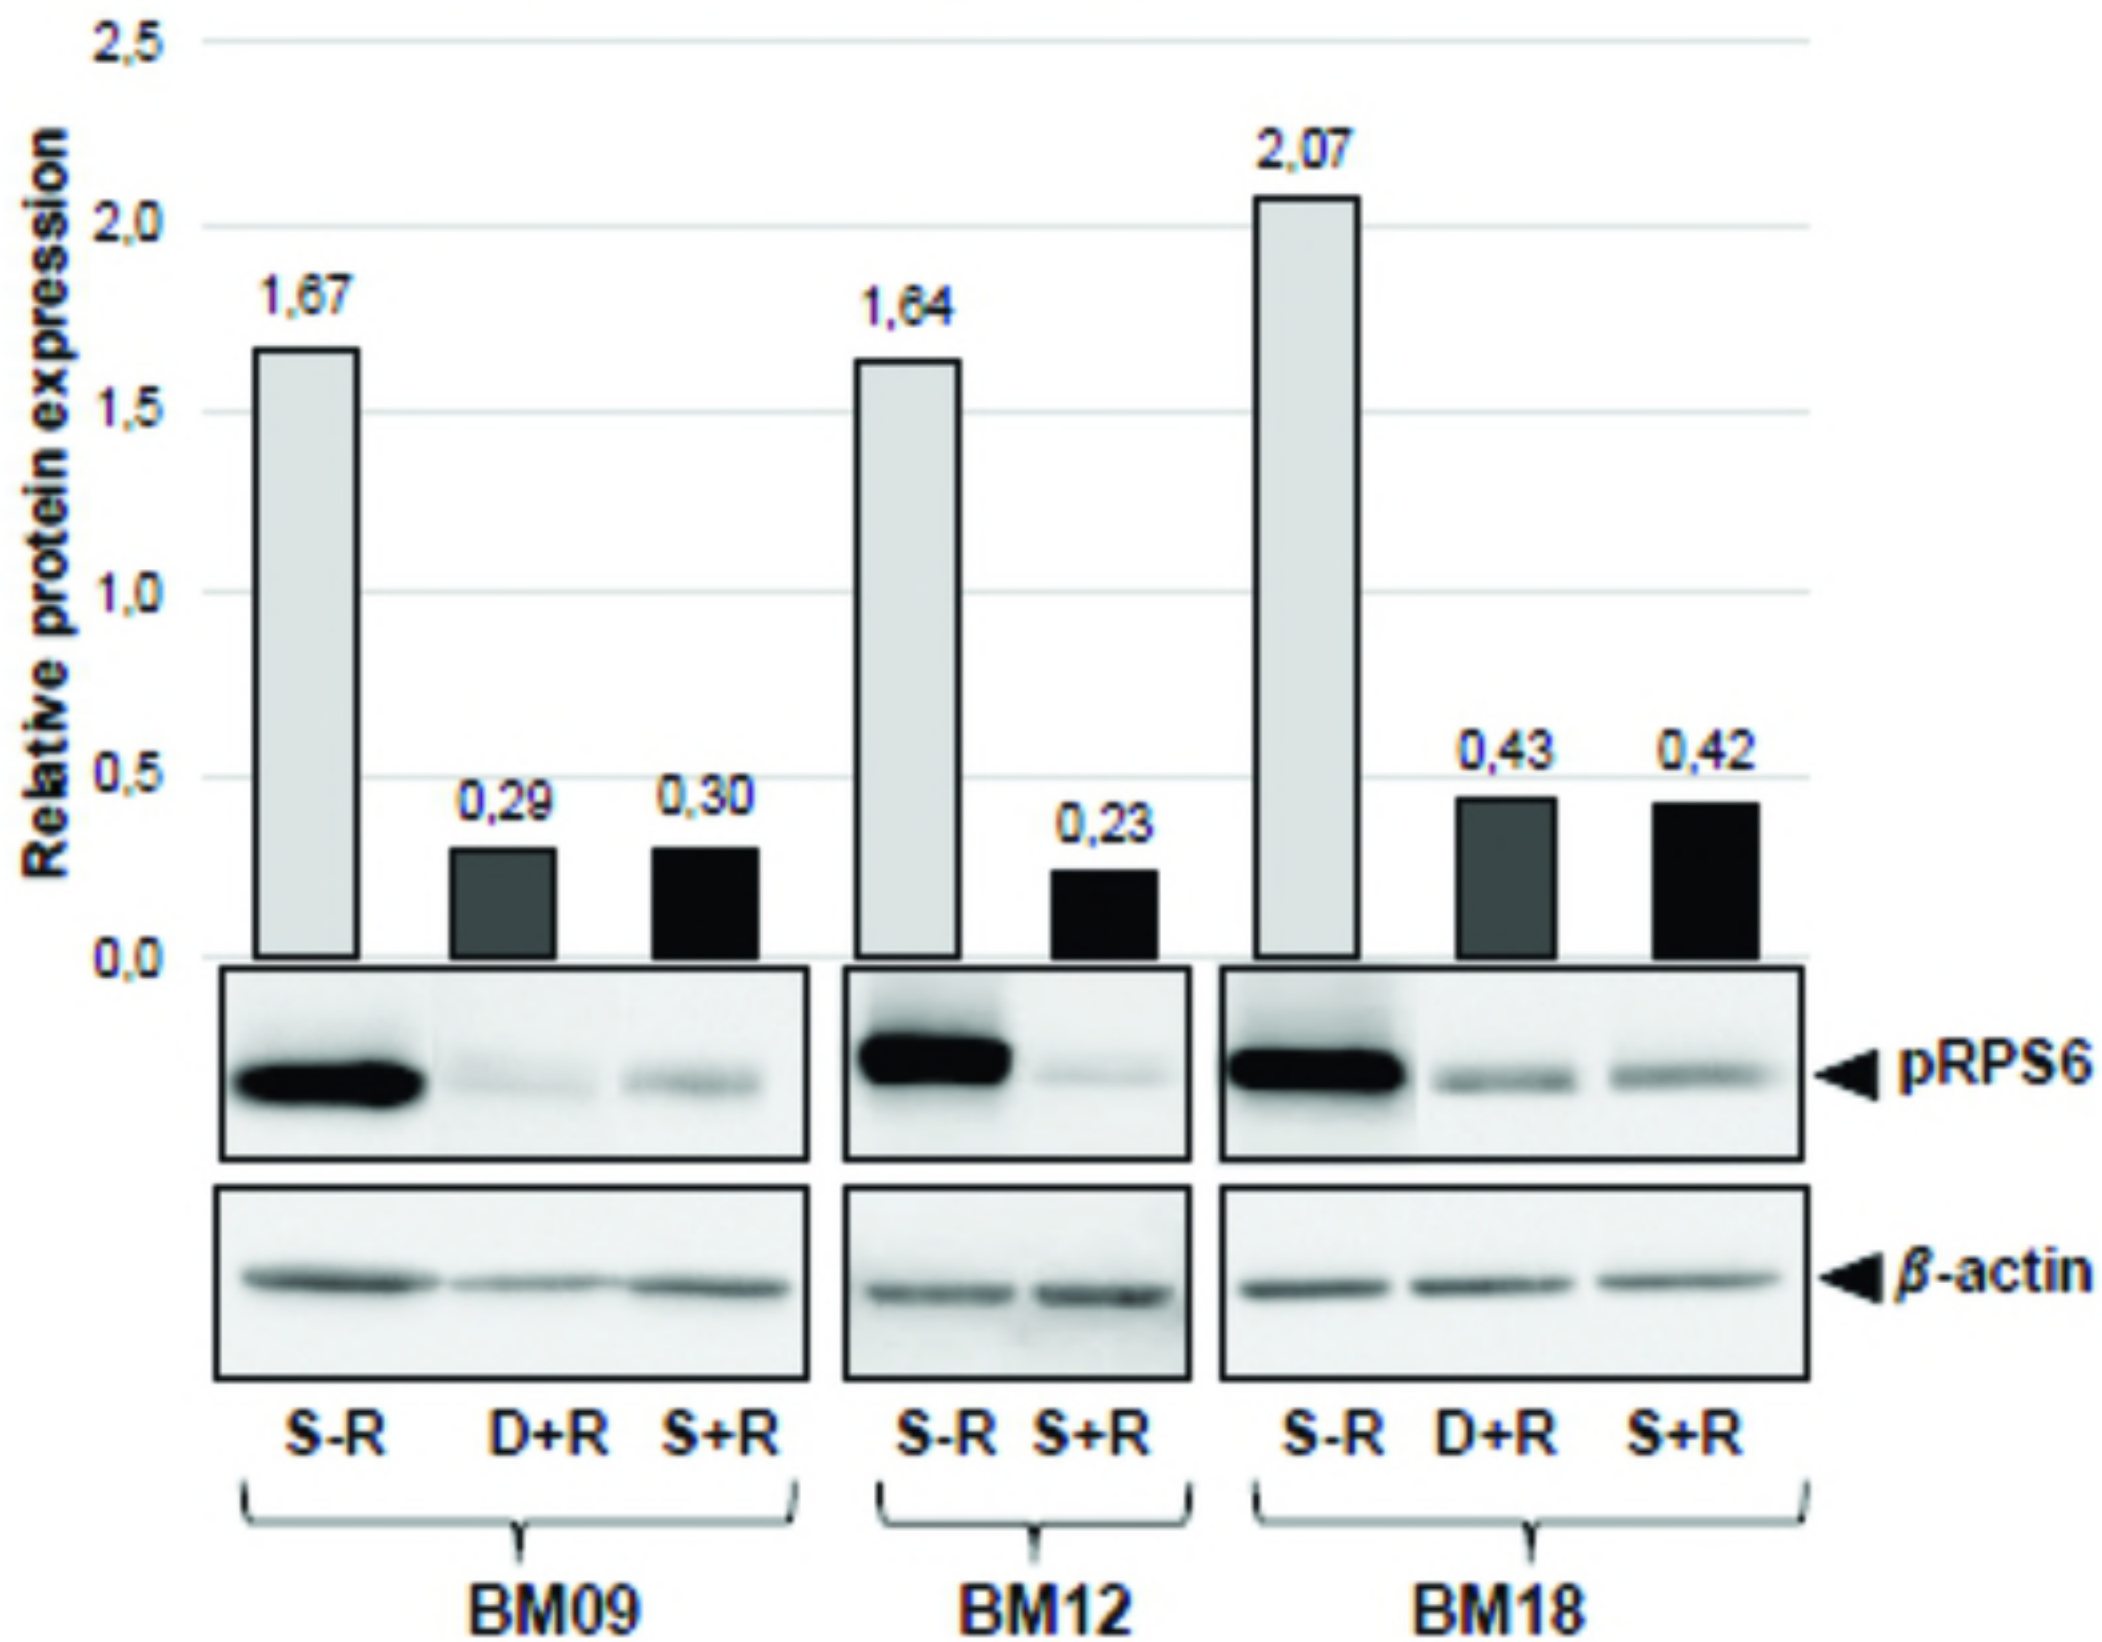



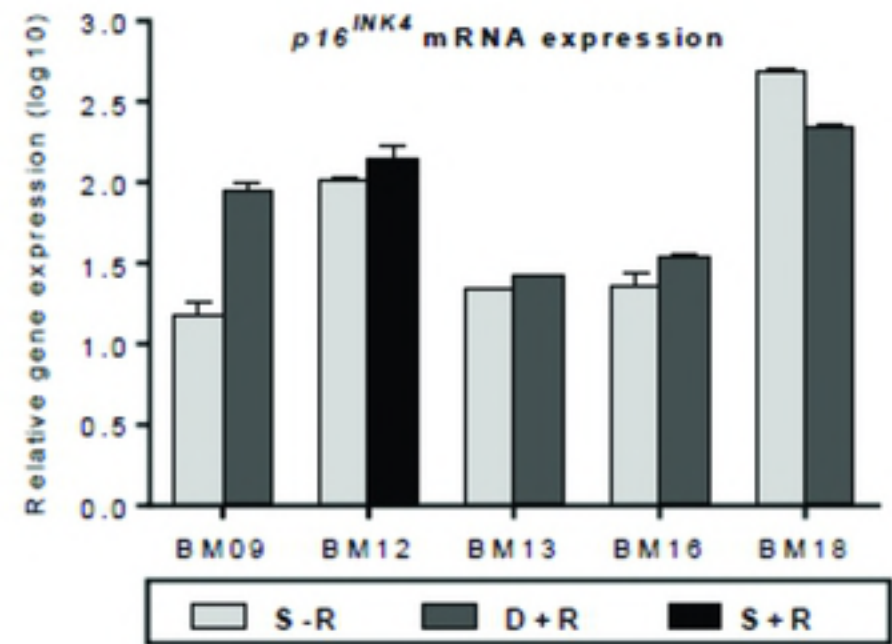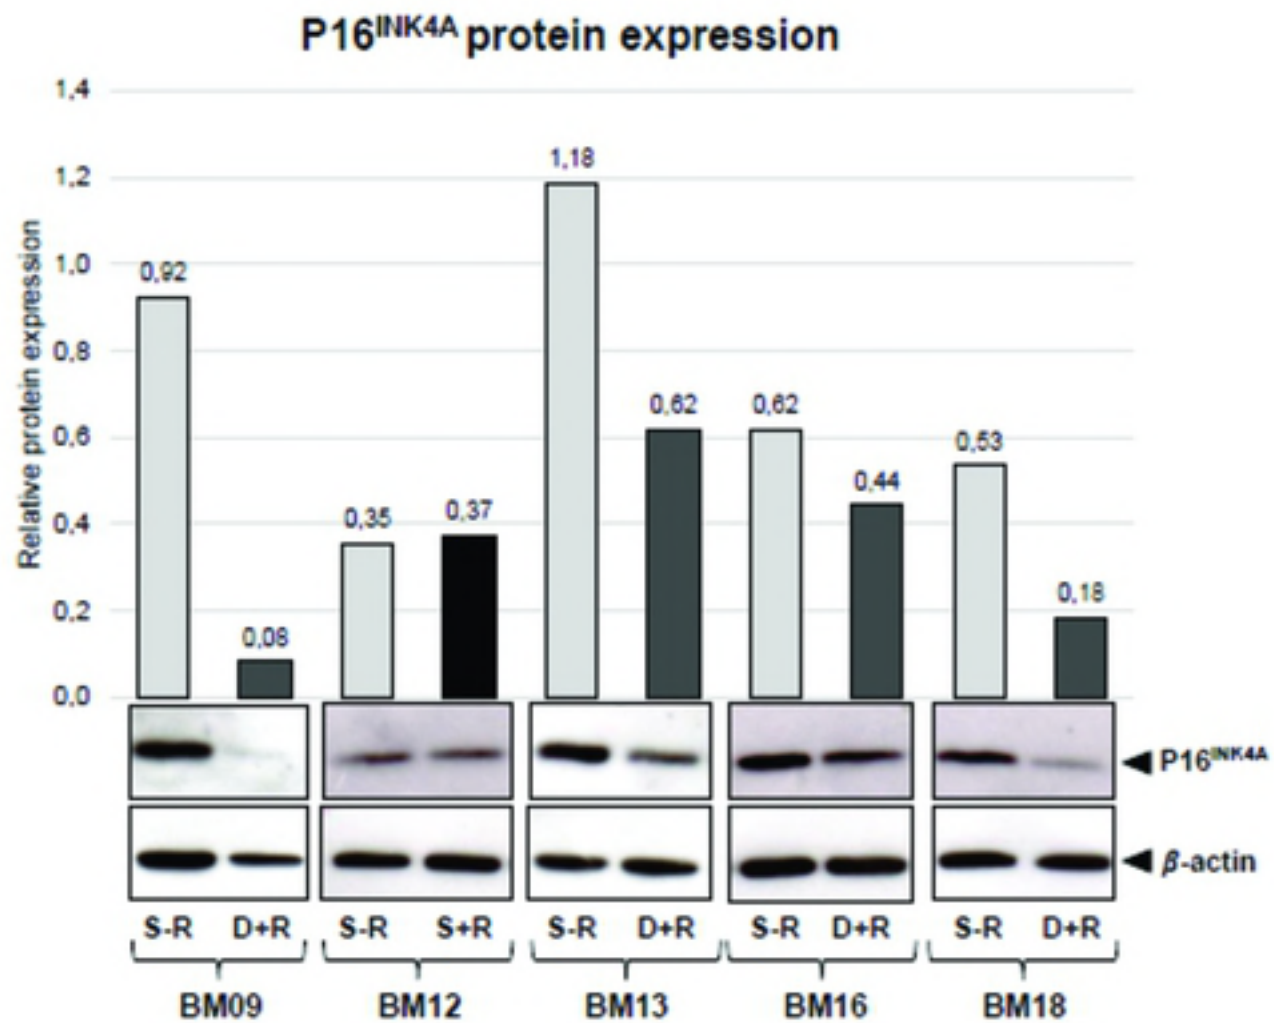

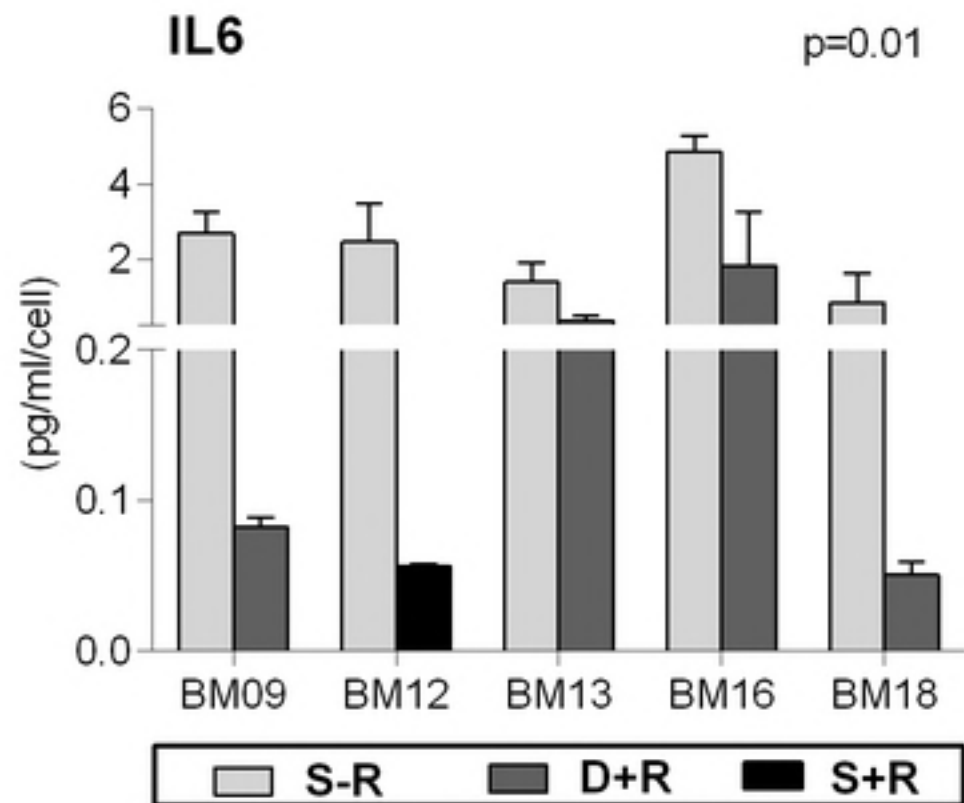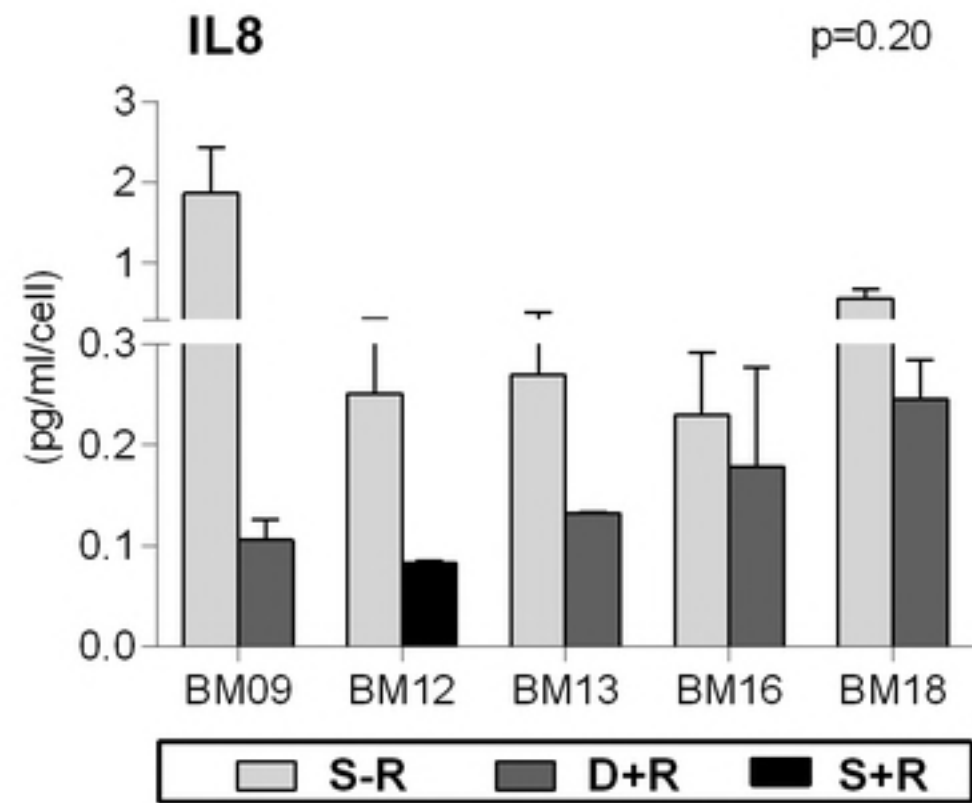



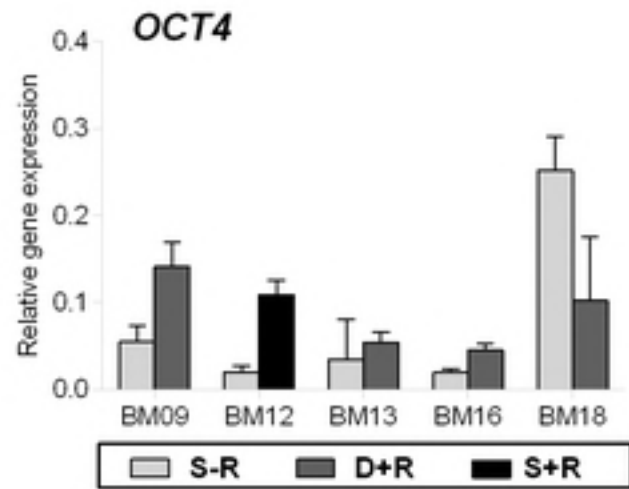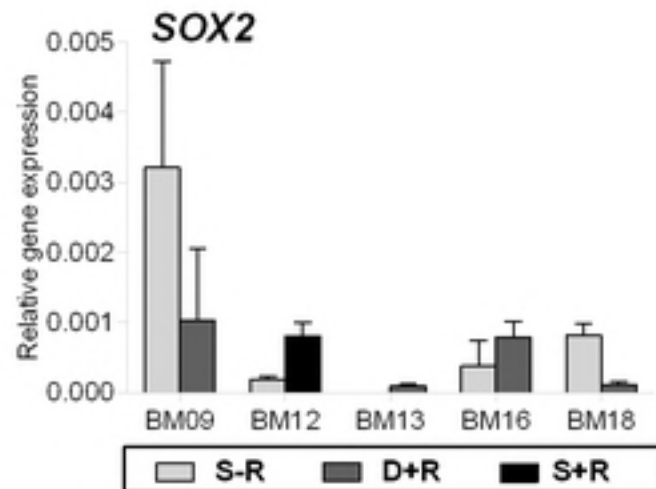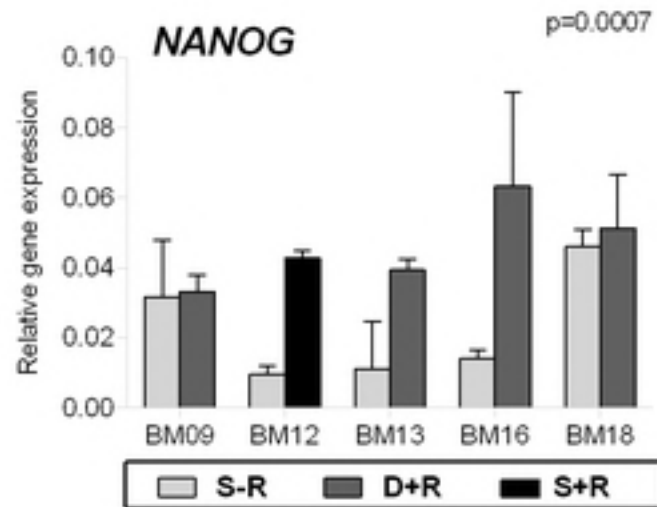

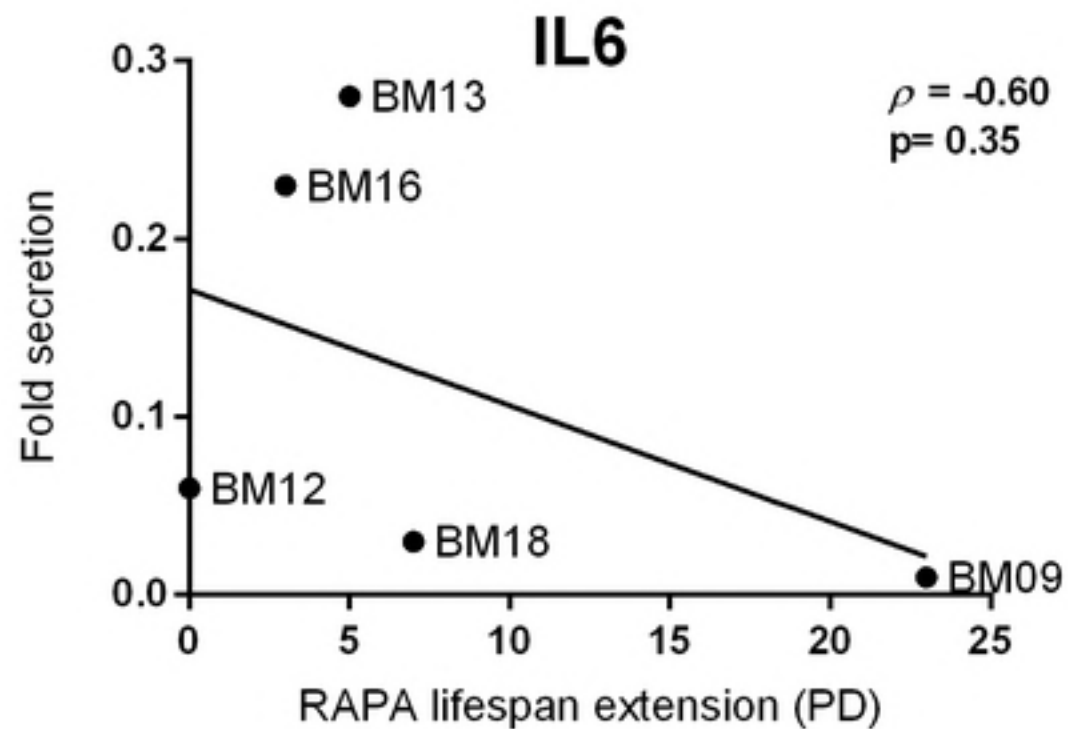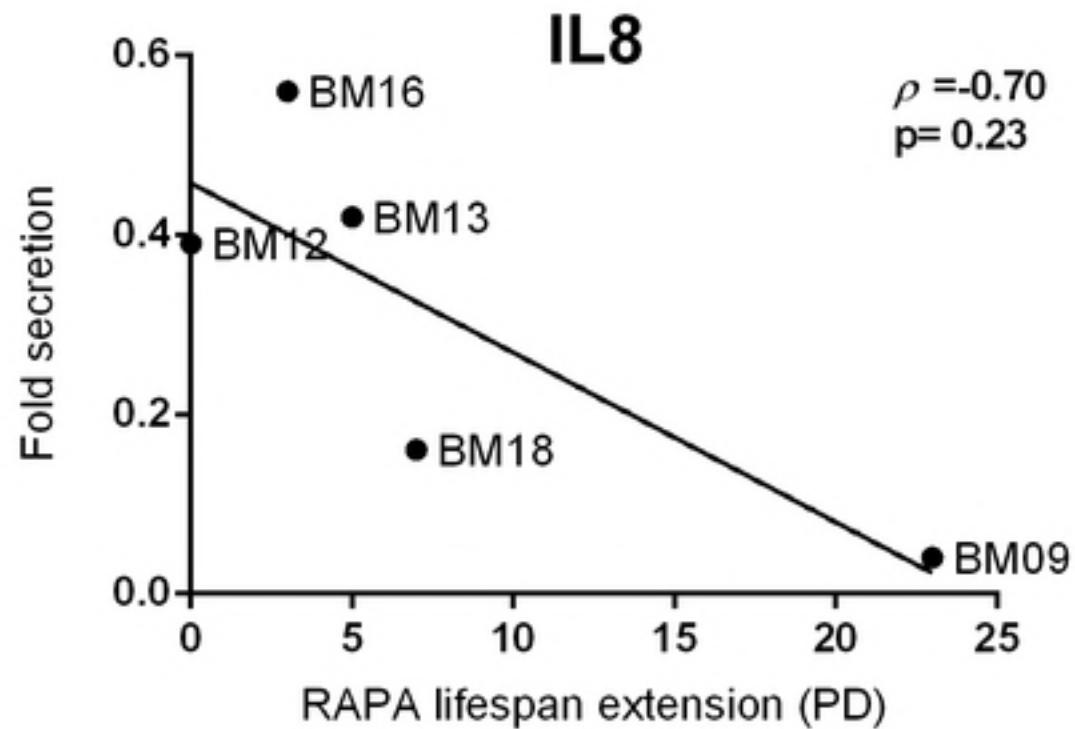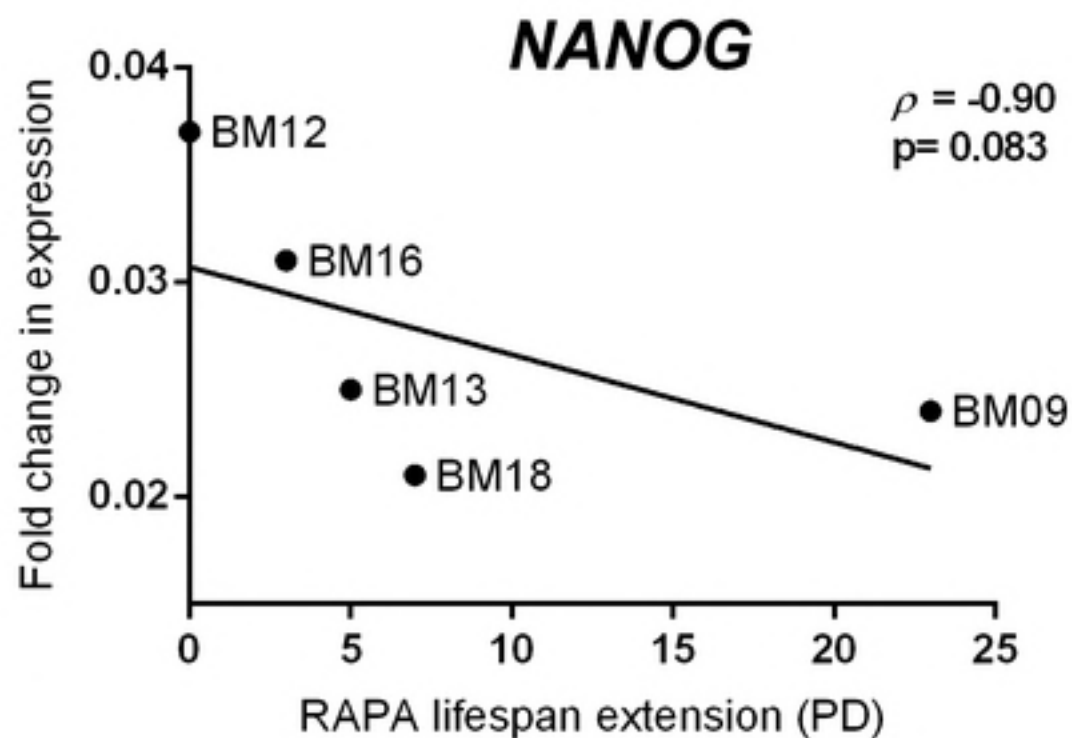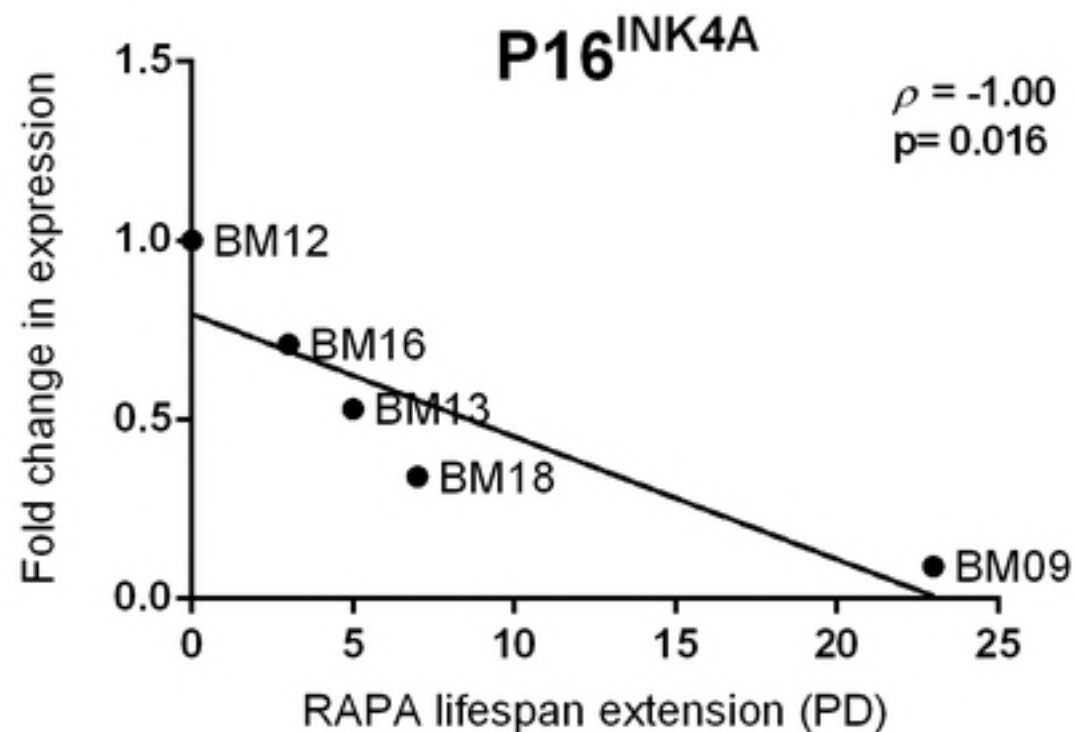

# P16<sup>INK4A</sup> expression

bioRxiv preprint doi: <https://doi.org/10.1101/420026>; this version posted September 17, 2018. The copyright holder for this preprint (which was not certified by peer review) is the author/funder, who has granted bioRxiv a license to display the preprint in perpetuity. It is made available under aCC-BY 4.0 International license.

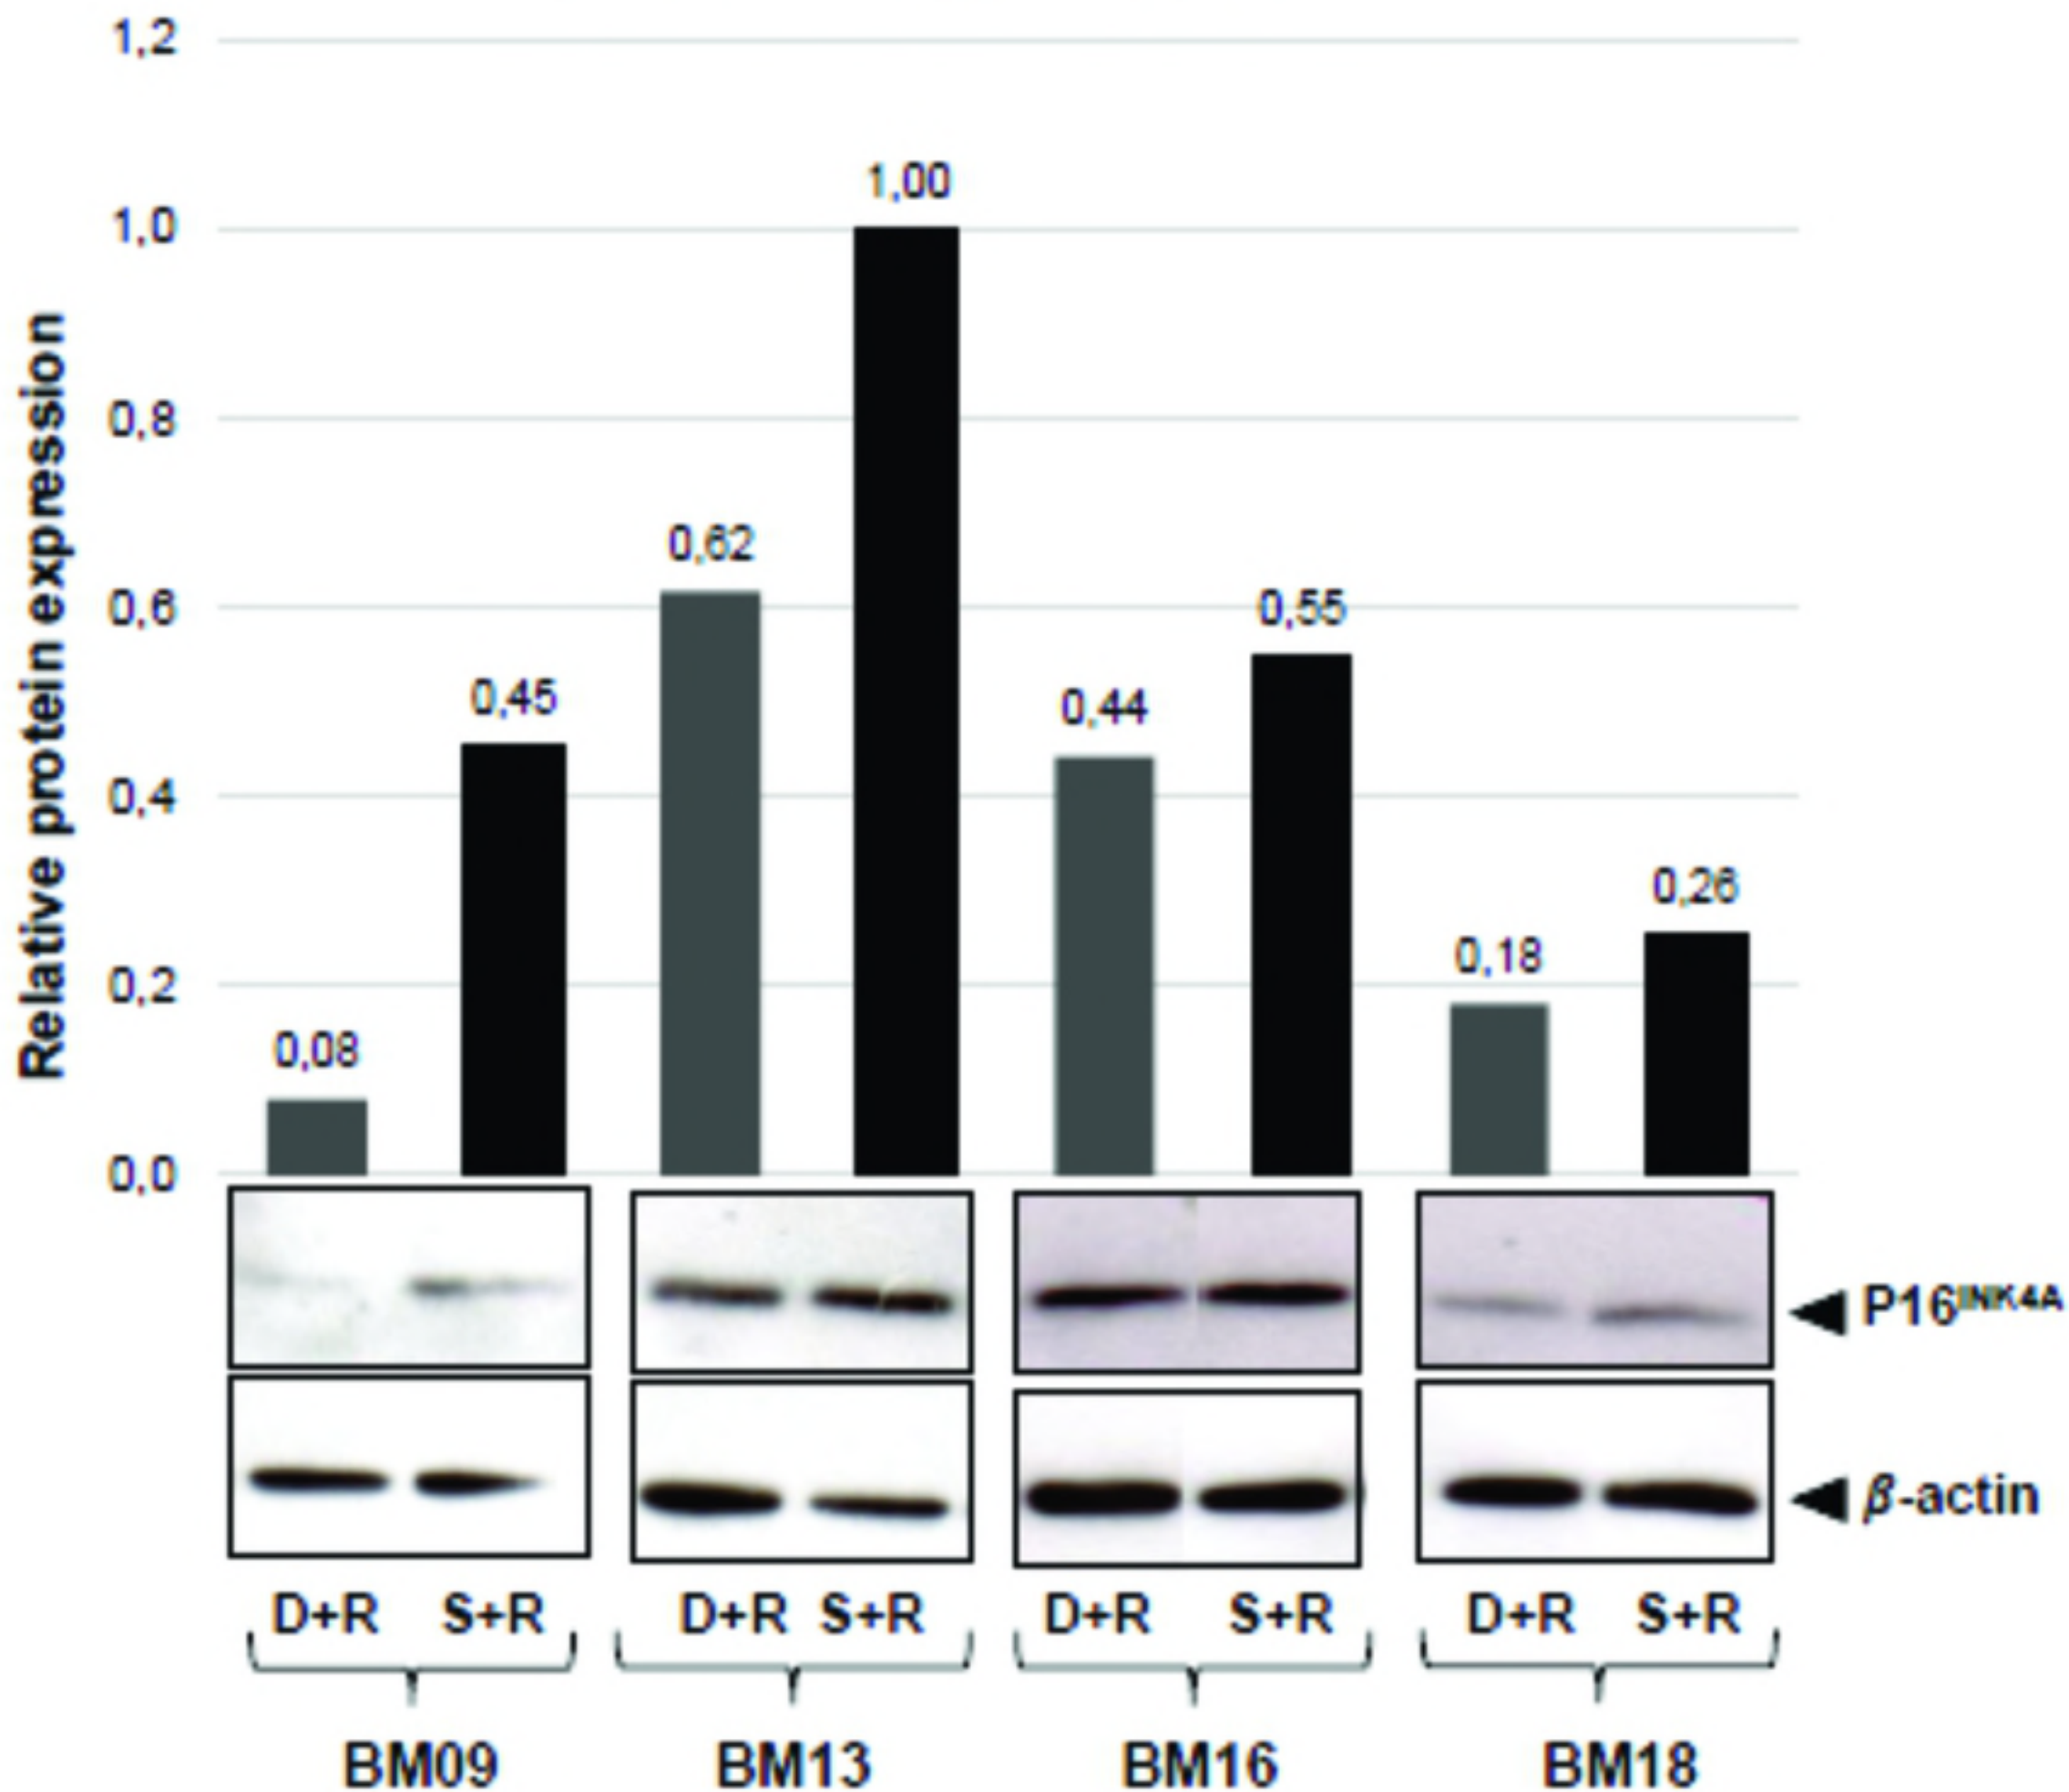

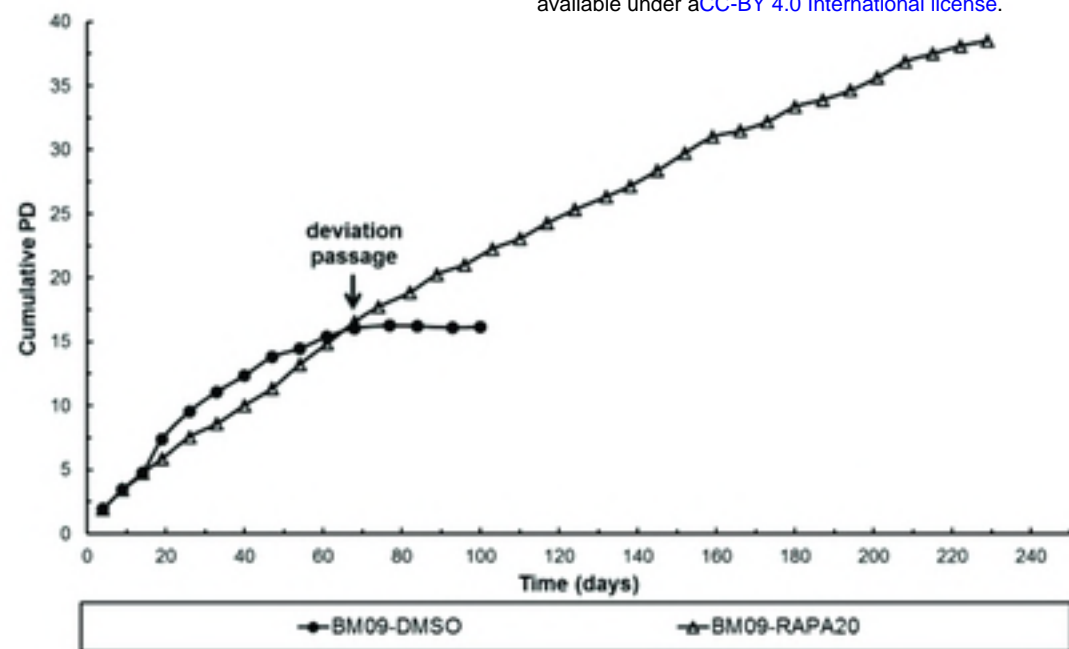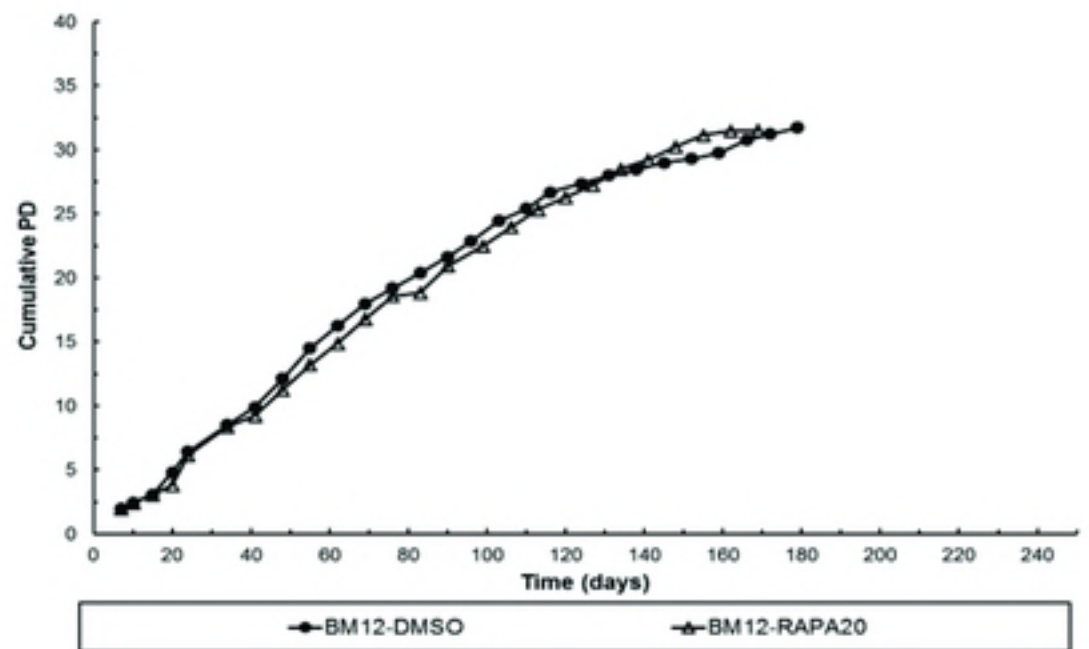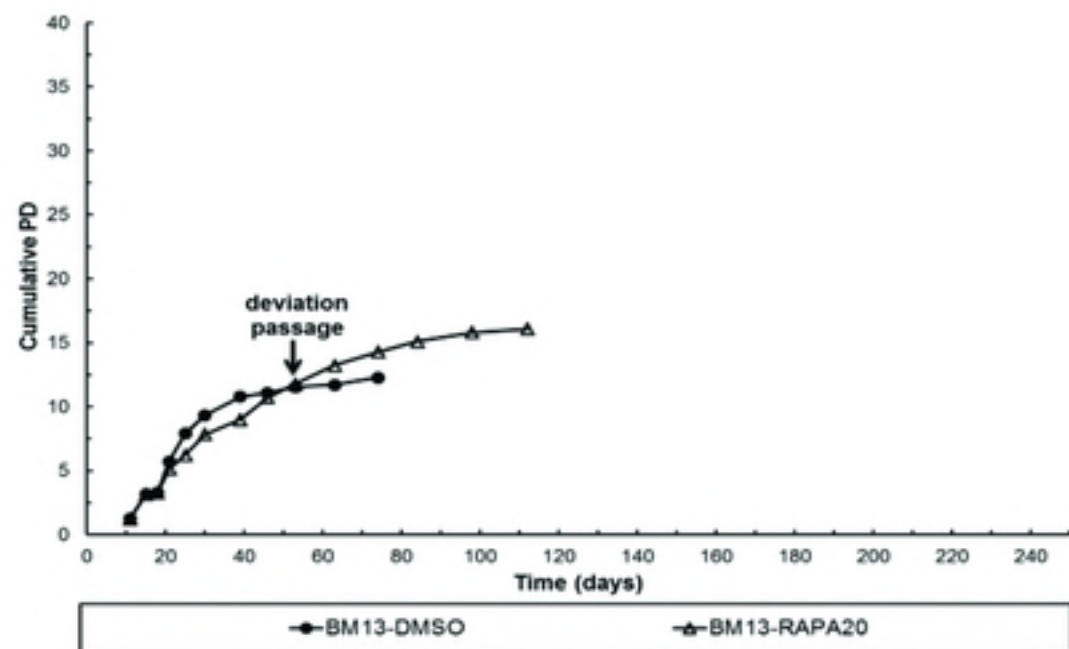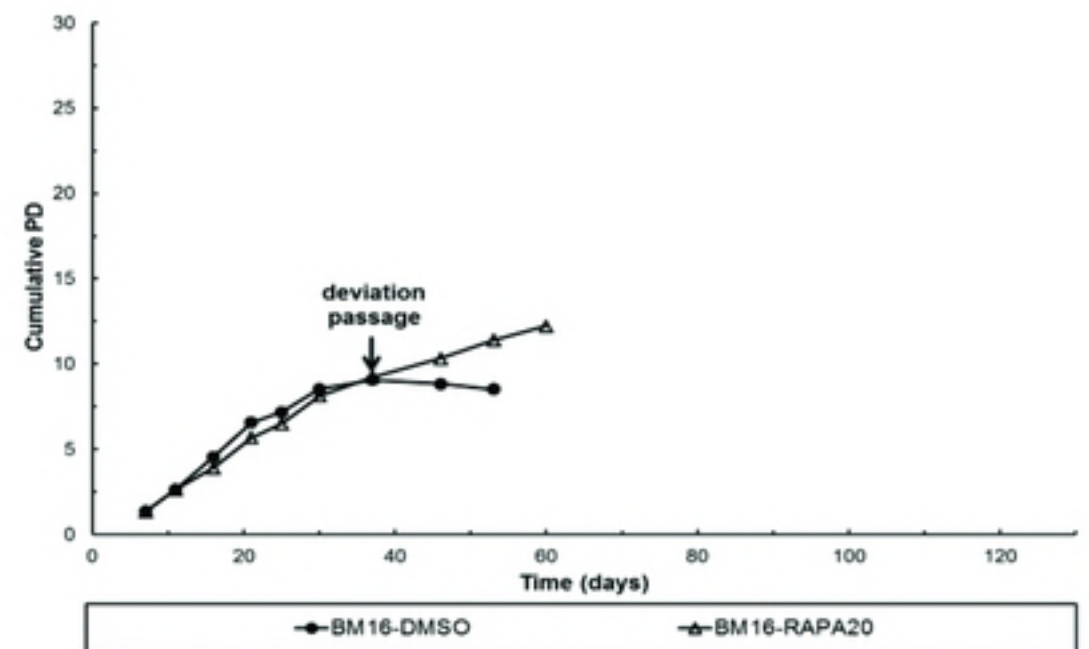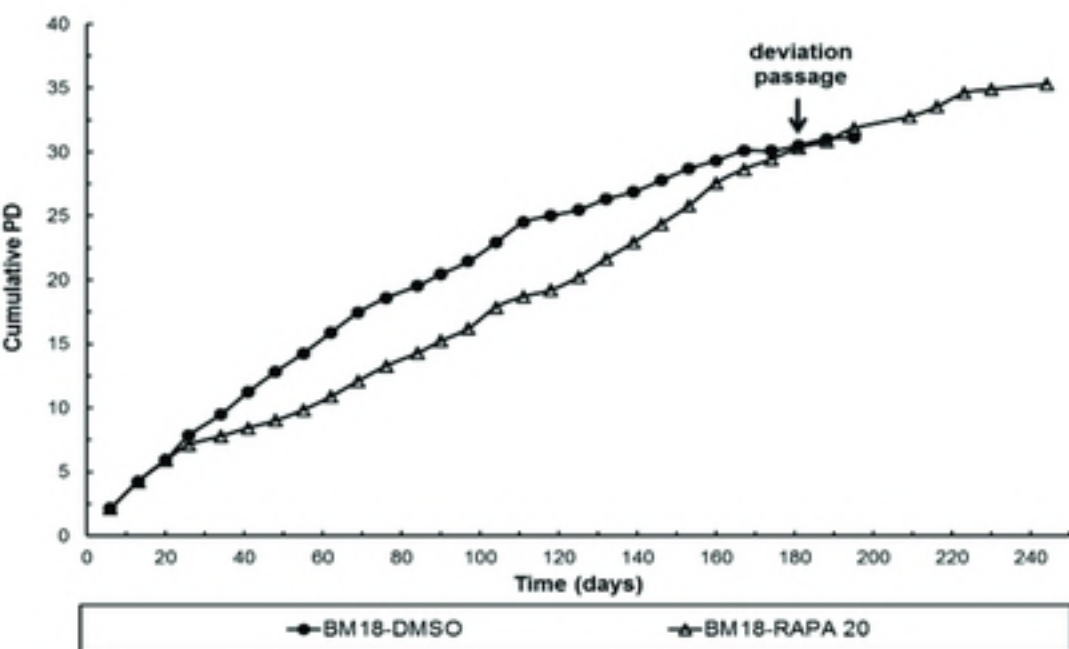

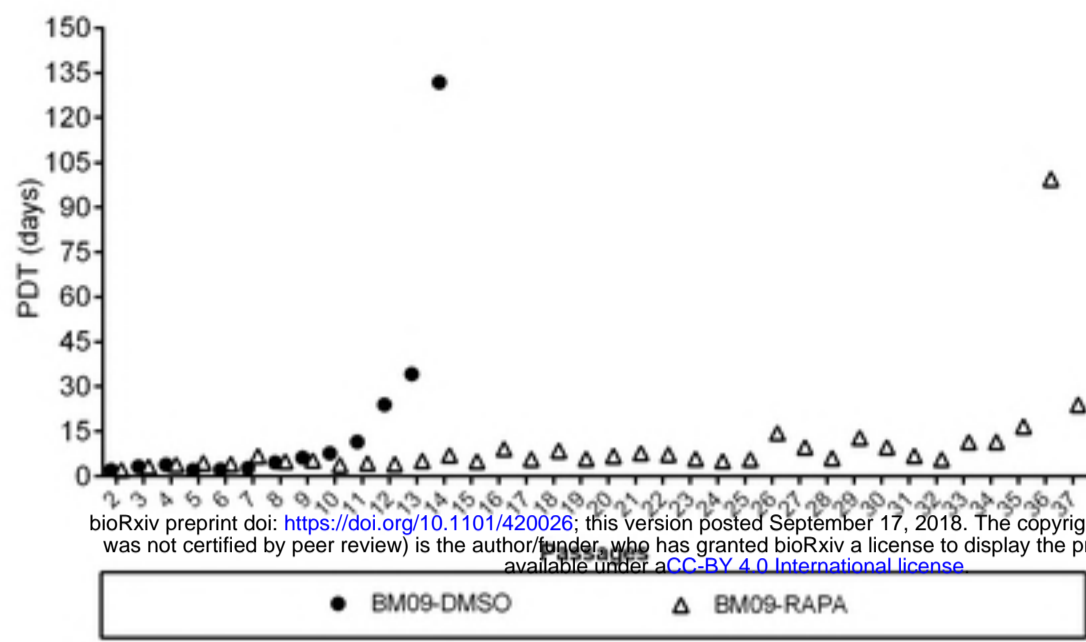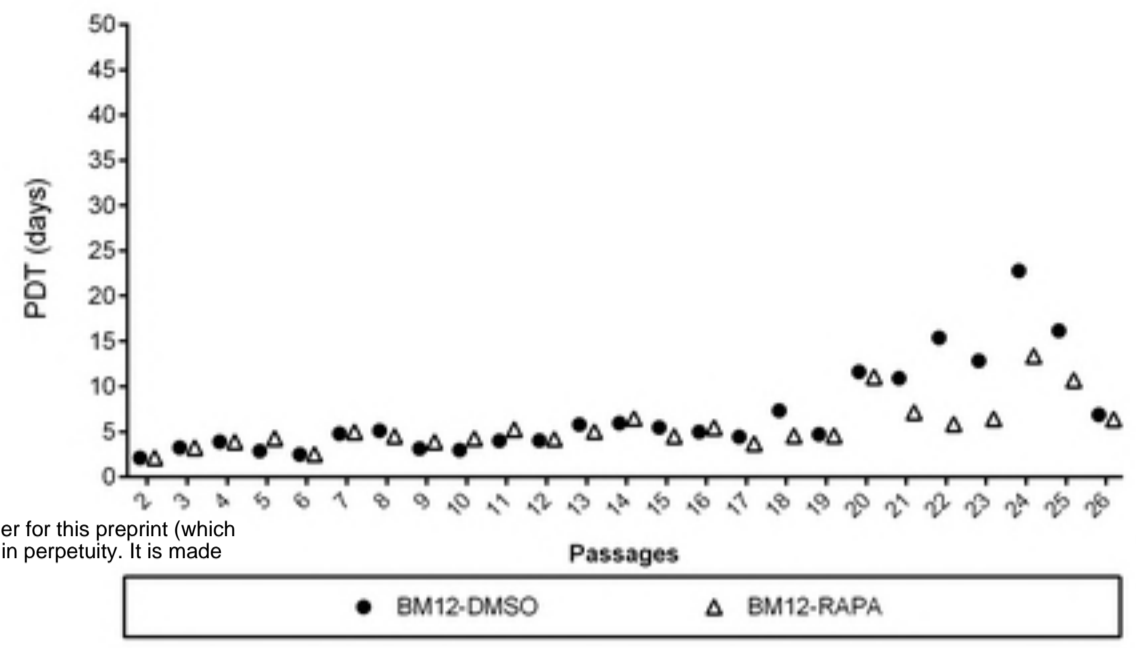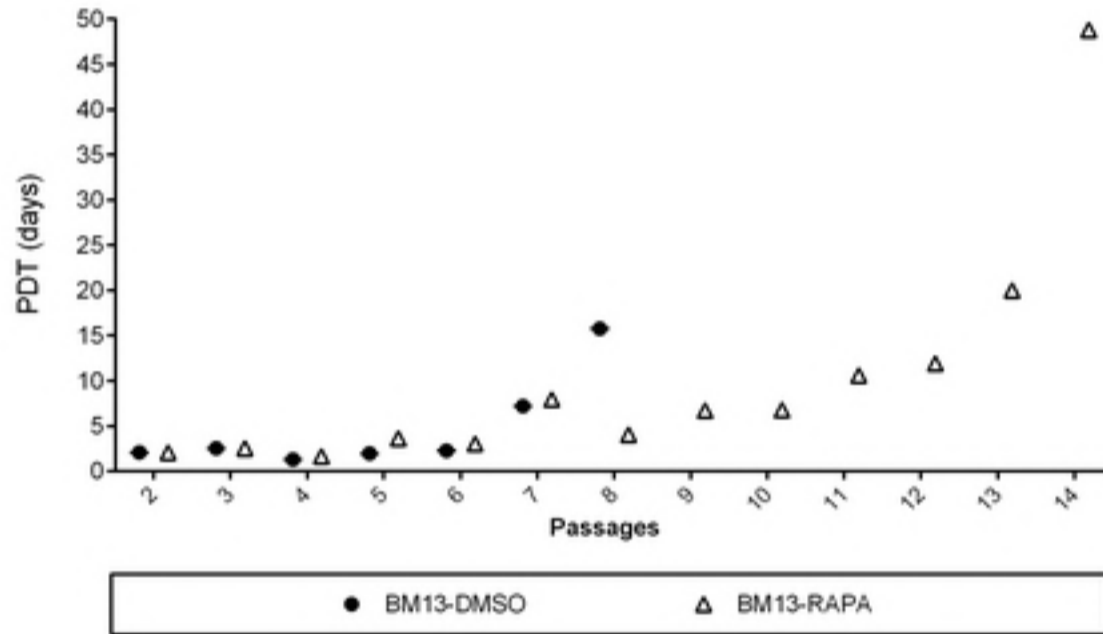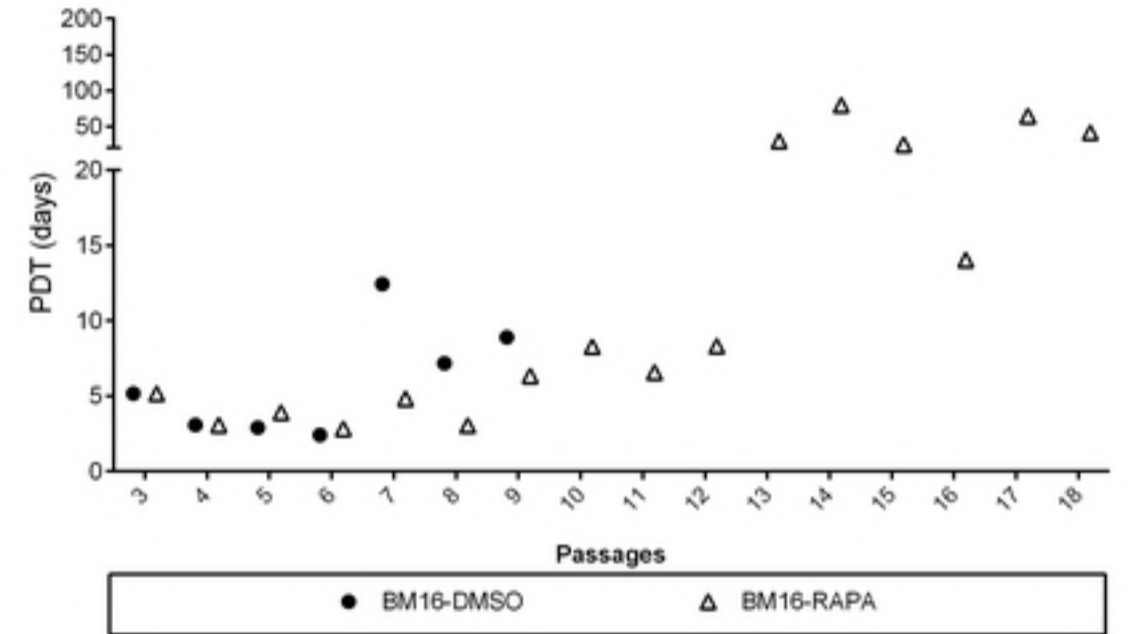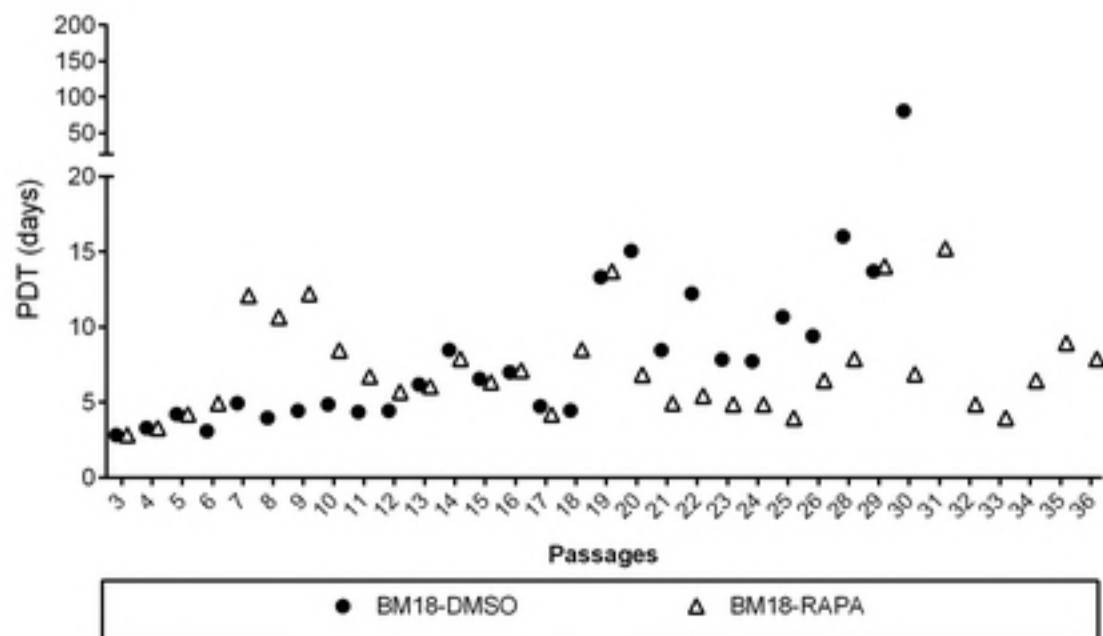

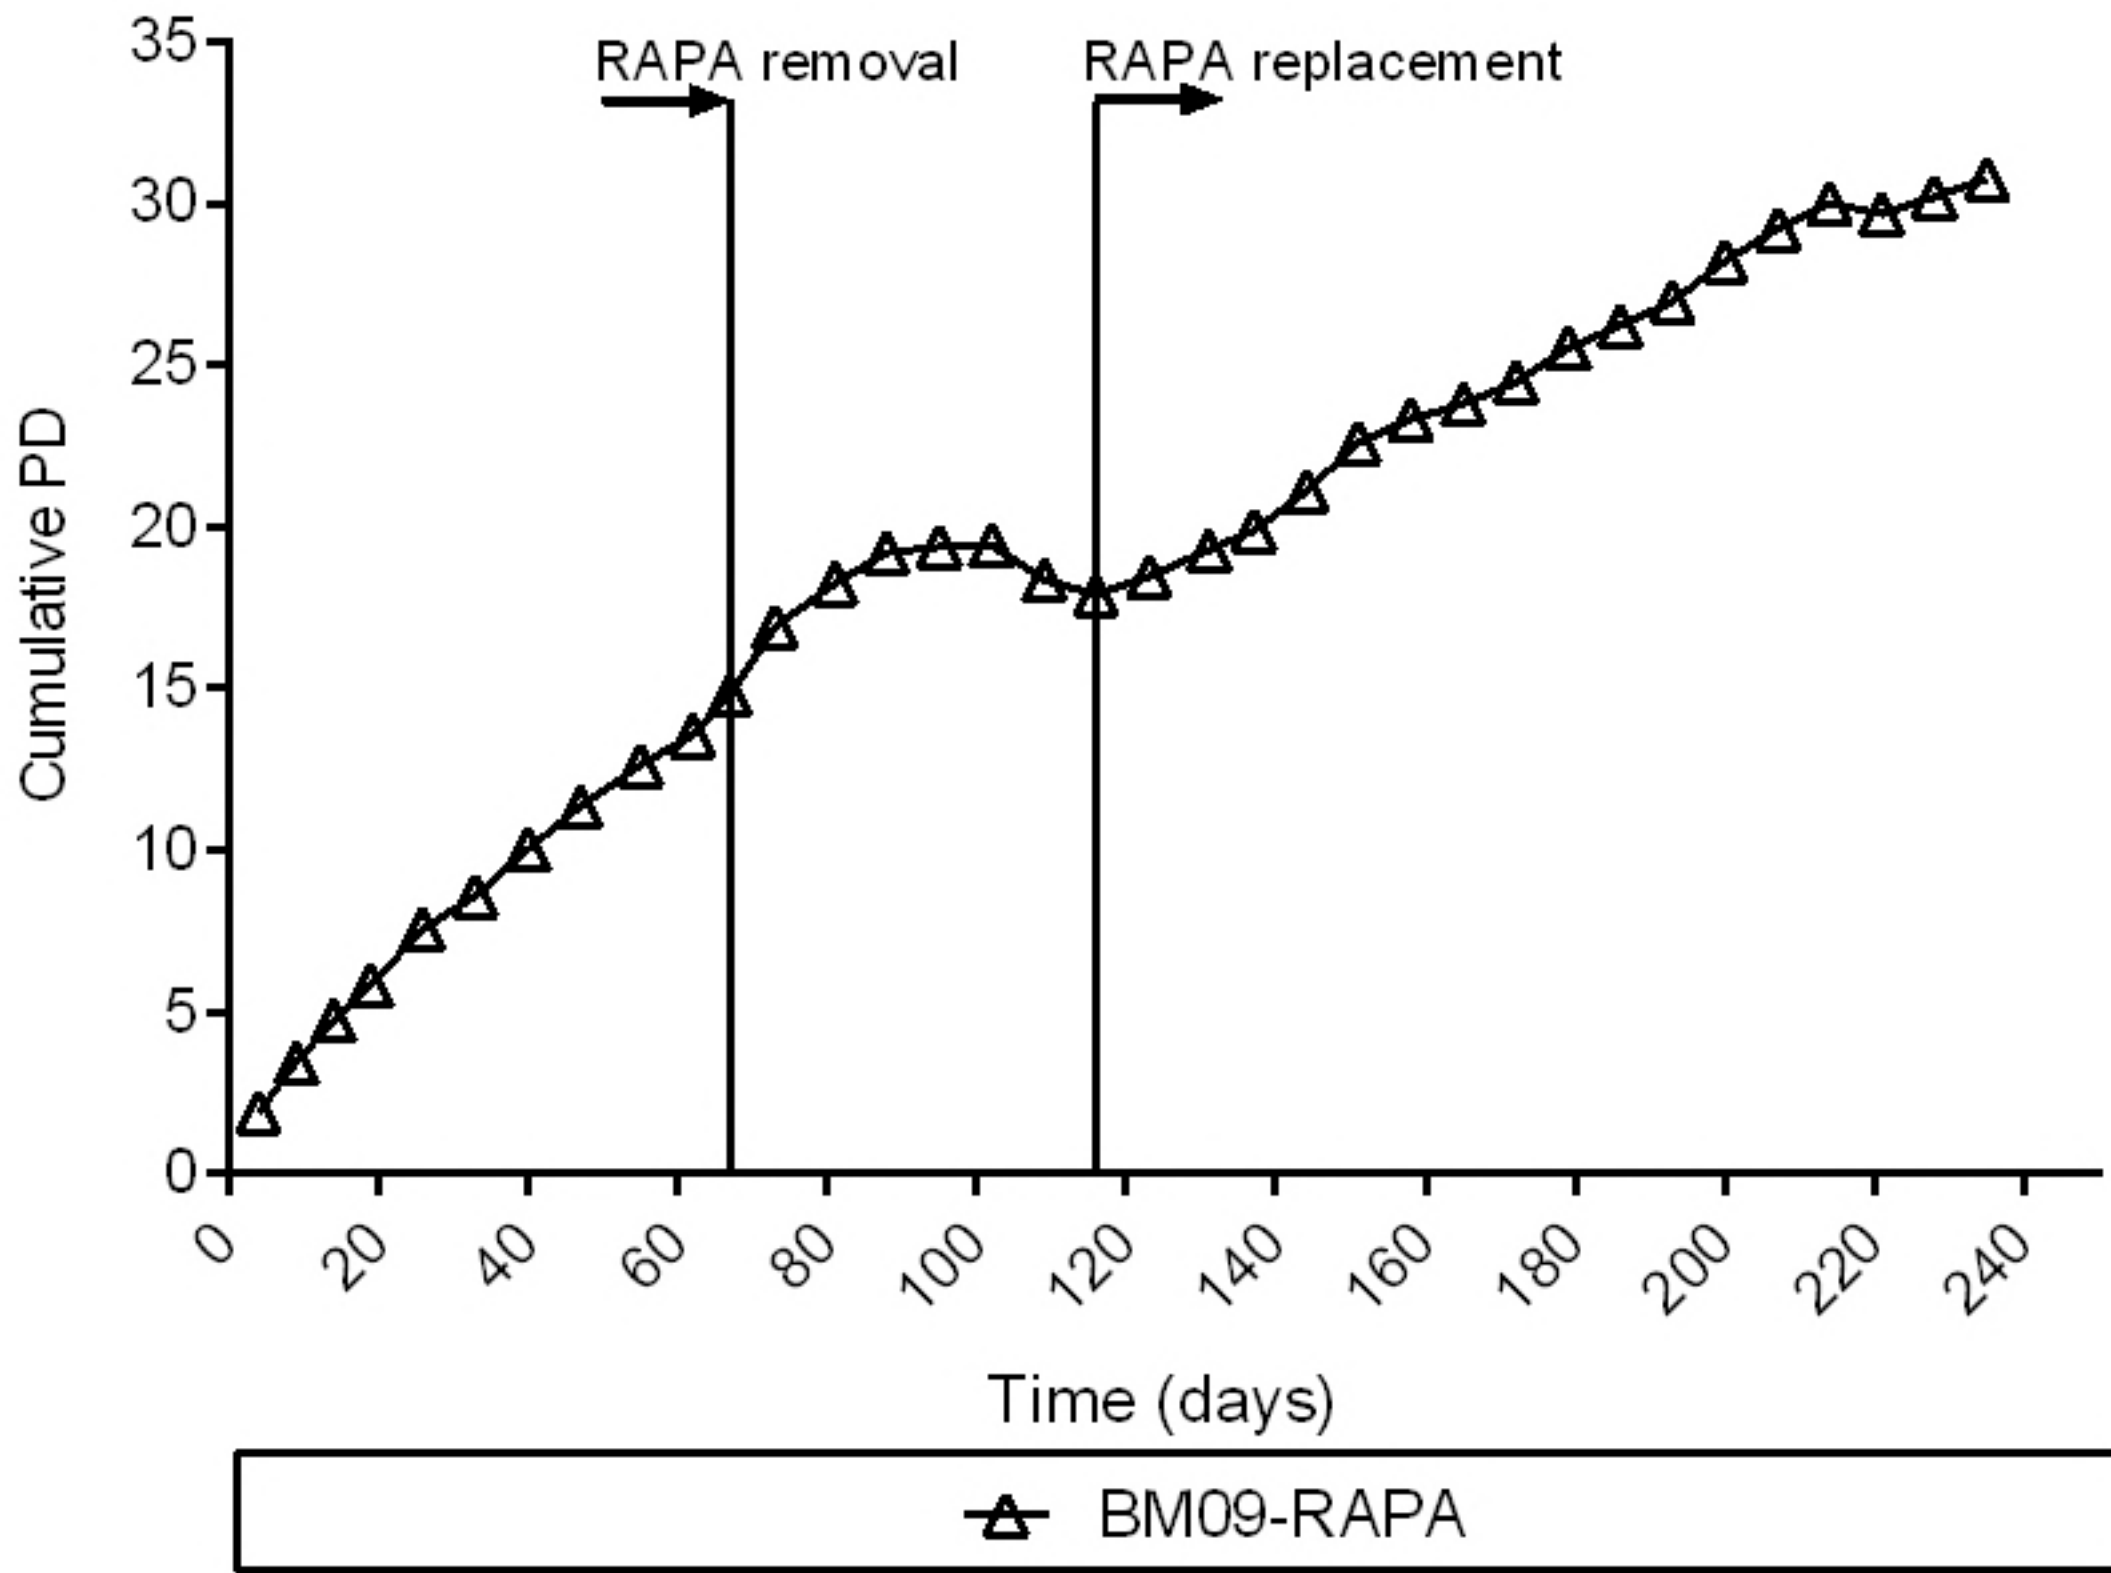

Source: https://biorxiv.org/content/biorxiv/early/2018/09/17/420026.full-text.pdf
